1 **A Pan-respiratory Antiviral Chemotype Targeting a Transient Host Multiprotein Complex**

2  
3 **Authors:** Andreas Müller-Schiffmann<sup>1</sup>, Maya Michon<sup>2</sup>, Anuradha F. Lingappa<sup>2</sup>, Shao Feng Yu<sup>2</sup>, Li Du<sup>3</sup>,  
4 Fred Deiter<sup>4</sup>, Sean Broce<sup>2</sup>, Suguna Mallesh<sup>2</sup>, Jackelyn Crabtree<sup>5</sup>, Usha F. Lingappa<sup>2</sup>, Amanda Macieik<sup>2</sup>,  
5 Lisa Müller<sup>6</sup>, Philipp Niklas Ostermann<sup>6</sup>, Marcel Andréé<sup>6</sup>, Ortwin Adams<sup>6</sup>, Heiner Schaal<sup>6</sup>, Robert J.  
6 Hogan<sup>5</sup>, Ralph A. Tripp<sup>5</sup>, Umesh Appaiah<sup>2</sup>, Sanjeev K. Anand<sup>7</sup>, Thomas W. Campi<sup>7</sup>, Michael J. Ford<sup>8</sup>,  
7 Jonathan C. Reed<sup>9</sup>, Jim Lin<sup>2</sup>, Olayemi Akintunde<sup>2</sup>, Kiel Copeland<sup>2</sup>, Christine Nichols<sup>2</sup>, Emma Petrouski<sup>2</sup>,  
8 A. Raquel Moreira<sup>2</sup>, I-ting Jiang<sup>2</sup>, Nicholas DeYarman<sup>2</sup>, Ian Brown<sup>2</sup>, Sharon Lau<sup>2</sup>, Ilana Segal<sup>2</sup>, Danielle  
9 Goldsmith<sup>2</sup>, Shi Hong<sup>2</sup>, Vinod Asundi<sup>2</sup>, Erica M. Briggs<sup>2</sup>, Ngwe Sin Phy<sup>2</sup>, Markus Froehlich<sup>2</sup>, Bruce  
10 Onisko<sup>10</sup>, Kent Matlack<sup>2</sup>, Debendranath Dey<sup>2</sup>, Jaisri R. Lingappa<sup>9</sup>, M. Dharma Prasad<sup>2</sup>, Anatoliy  
11 Kitaygorodskyy<sup>2</sup>, Dennis Solas<sup>2</sup>, Homer Boushey<sup>11</sup>, John Greenland<sup>4,11</sup>, Satish Pillai<sup>3,11</sup>, Michael K. Lo<sup>12</sup>,  
12 Joel M. Montgomery<sup>12</sup>, Christina F. Spiropoulou<sup>12</sup>, Carsten Korth<sup>1</sup>, Suganya Selvarajah<sup>2</sup>, Kumar  
13 Paulvannan<sup>2</sup>, and Vishwanath R. Lingappa<sup>2,11\*</sup>

14  
15 **Affiliations:**

16 <sup>1</sup> Institute of Neuropathology, Heinrich Heine University, Düsseldorf, Germany.

17 <sup>2</sup> Prosetta Biosciences, San Francisco, CA, USA.

18 <sup>3</sup> Vitalant Research Institute, San Francisco, CA, USA.

19 <sup>4</sup> Veterans Administration Medical Center, San Francisco, CA, USA

20 <sup>5</sup> University of Georgia, Animal Health Research Center, Athens, GA, USA.

21 <sup>6</sup> Institute of Virology, Heinrich Heine University, Düsseldorf, Germany.

22 <sup>7</sup> Santo Biotech, LLC., Pendleton, IN, USA.

23 <sup>8</sup> MS Bioworks, Ann Arbor, MI, USA.

24 <sup>9</sup> Dept. of Global Health, University of Washington, Seattle, WA, USA.

25 <sup>10</sup> Onipro LLC., Kensington, CA, USA.

26 <sup>11</sup> University of California, San Francisco, CA, USA.

27 <sup>12</sup> Viral Special Pathogens Branch, US Centers for Disease Control and Prevention, Atlanta, GA, USA

28 \* To whom correspondence should be addressed: vlingappa@prosetta.com

29  
30  
31  
32  
33  
34  
35  
36

37 **Abstract:**

38 We present a small molecule chemotype, identified by an orthogonal drug screen, exhibiting nanomolar  
39 activity against members of all the six viral families causing most human respiratory viral disease, with a  
40 demonstrated barrier to resistance development. Antiviral activity is shown in mammalian cells,  
41 including human primary bronchial epithelial cells cultured to an air-liquid interface and infected with  
42 SARS-CoV-2. In animals, efficacy of early compounds in the lead series is shown by survival (for a  
43 coronavirus) and viral load (for a paramyxovirus). The drug target is shown to include a subset of the  
44 protein 14-3-3 within a transient host multi-protein complex containing components implicated in viral  
45 lifecycles and in innate immunity. This multi-protein complex is modified upon viral infection and largely  
46 restored by drug treatment. Our findings suggest a new clinical therapeutic strategy for early treatment  
47 upon upper respiratory viral infection to prevent progression to lower respiratory tract or systemic  
48 disease.

49

50 **One Sentence Summary:**

51 A host-targeted drug to treat all respiratory viruses without viral resistance development.

52

## 53 **Introduction**

54           The current SARS-CoV-2 pandemic has been characterized by waves of infection involving  
55 emerging mutants with varying degrees of resistance to current vaccines and treatments, confounded by  
56 waning immune responses. The risk of a new pandemic, as from high pathogenicity avian influenza or  
57 other viruses transmitted first from an animal reservoir to humans and then from human to humans, is  
58 ever present (European Food Safety Authority, European Centre for Disease Prevention, Control,  
59 European Union Reference Laboratory for Avian Influenza et al., 2021). Here we report findings  
60 suggesting an alternative antiviral approach involving an orally bioavailable small molecule drug directed  
61 to a novel host multi-protein complex target that is modified by members of the major viral families  
62 causing human respiratory tract disease. This chemotype is shown to avoid viral resistance development  
63 and would enable early treatment, at the onset of upper respiratory tract symptoms (e.g. a sore throat), to  
64 prevent progression to serious lower respiratory and/or systemic disease, regardless of the virus.

65           Viruses are recognized as challenging adversaries for two very different reasons. First, their small  
66 genomes mandate a reproductive strategy that involves reprogramming host protein machinery to meet  
67 viral needs rather than host homeostasis (Goodwin et al., 2015). This also means that there are relatively  
68 few virus-specific drug targets; all other targets (i.e. host machinery) have been presumed to have a high  
69 intrinsic risk of host toxicity. The second reason that antiviral therapeutics is challenging is that viral  
70 generation time is so much shorter than ours. This allows viruses, particularly RNA viruses, to rapidly  
71 evolve mutants that are resistant to virus-targeted therapies, including vaccines or drugs (Ison, 2011; Peck  
72 and Lauring, 2018).

73           A subset of antiviral targets represent an overlap between the virus and the host: the points of  
74 protein-protein interaction between the forementioned viral and host target classes (Andrei et al., 2017;  
75 Goodacre et al., 2020). Such targets have been historically difficult to identify and even harder to drug.  
76 However, the reproductive strategy of viruses also presents an opportunity to detect targets that are  
77 relatively inaccessible to conventional drug discovery methods. Over eons of time, viral evolution has  
78 selected for the most valuable of innumerable potential host targets and refined the best approach to

79 reprogramming those targets to meet the needs of the virus (Koonin et al., 2015; Krupovic and Koonin,  
80 2017). In so doing, viruses have exploited features of our biology that we have yet to discover, including  
81 detection of targets not accessible to conventional proteomics (Aslam et al., 2017). It occurred to us that  
82 it might be possible to interrogate viruses in a manner that would reveal host targets not detected by  
83 current methods. Towards this end, we adapted the methods of cell-free protein synthesis and assembly  
84 (CFPSA), a variation on the tool by which the genetic code was deciphered (Nirenberg, 2004) and by  
85 which protein trafficking was deconvoluted (Blobel, 2000), to functionally reconstitute the transient virus-  
86 host protein-protein interactions culminating in viral capsid assembly (Lingappa et al., 1997, 1994;  
87 Lingappa and Lingappa, 2005). The CFPSA system was used to establish a phenotypic screen of drug-  
88 like small molecules for disruption of those protein-protein interactions to the detriment of the virus, as  
89 validated by their inhibition of replication of infectious virus in mammalian cell culture (Lingappa et al.,  
90 2013; Reed et al., 2021) and efficacy in animals.

91

## 92 **Results**

### 93 *Discovery of antiviral compounds active across respiratory viral families*

94 A body of literature suggests that viral capsid formation is catalyzed by host factors (Lingappa et  
95 al., 2021, 1997, 2013; Reed et al., 2021). Much of this prior work involved CFPSA systems programmed  
96 with mRNA encoding viral capsid proteins. A moderate throughput phenotypic drug screen involving  
97 CFPSA of influenza (FLUV) encoded proteins was developed (Petsch et al., 2010), analogous to what has  
98 also been done for rabies (Lingappa et al., 2013), HIV (Copeland et al., 2010; Reed et al., 2021), and  
99 other viruses (Broce et al., 2016). This screen is carried out in cellular extracts rather than in living cells,  
100 with formation of multimeric capsid protein complexes as a quantifiable, functional endpoint (Harrell,  
101 E.K.T. et al., 2010). Thus, the screen identified compounds that interfere with the biochemical pathway of  
102 host-catalyzed capsid assembly. Compounds identified as active by this method have therefore been  
103 termed *assembly modulators*. Three structurally unrelated assembly modulator hits were corroborated to  
104 be active against infectious FLUV in mammalian cells and advanced by structure-activity-relationship

105 optimization towards analogs demonstrating progressively higher antiviral activity with reduced cellular  
 106 toxicity (Figure 1). One of these chemotypes was further advanced and is the focus of the studies  
 107 reported here.

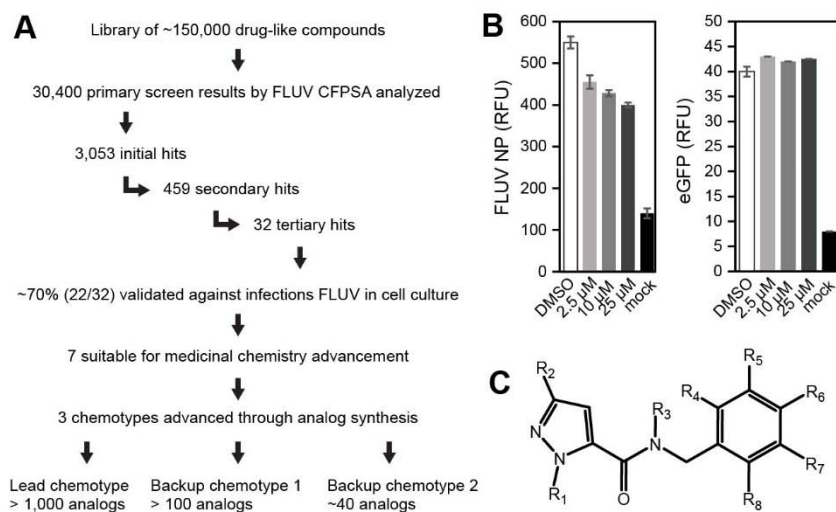

**D**

| compound | R <sub>1</sub>                     | R <sub>2</sub> | R <sub>3</sub> | R <sub>4</sub>      | R <sub>5</sub>      | R <sub>6</sub>    | R <sub>7</sub> | R <sub>8</sub> | EC <sub>50</sub> (μM) |
|----------|------------------------------------|----------------|----------------|---------------------|---------------------|-------------------|----------------|----------------|-----------------------|
| PAV-770  | Me                                 | t-Bu           | H              | O-CH <sub>2</sub> - | CH <sub>2</sub> -O- | H                 | F              | H              | 1 - 3                 |
| PAV-868  | Me                                 | t-Bu           | H              | OMe                 | OMe                 | OMe               | H              | H              | > 3                   |
| PAV-858  | Me                                 | t-Bu           | H              | OMe                 | H                   | OMe               | OMe            | H              | > 3                   |
| PAV-772  | Me                                 | t-Bu           | H              | OMe                 | F                   | H                 | F              | H              | 3                     |
| PAV-736  | CH <sub>2</sub> CH <sub>2</sub> OH | t-Bu           | H              | OMe                 | OMe                 | H                 | H              | H              | > 3                   |
| PAV-869  | Me                                 | t-Bu           | H              | OPr                 | OMe                 | H                 | H              | H              | > 3                   |
| PAV-773  | Me                                 | t-Bu           | H              | OMe                 | OMe                 | H                 | H              | H              | < 1                   |
| PAV-1866 | Me                                 | t-Bu           | Me             | OMe                 | OMe                 | H                 | H              | H              | > 3                   |
| PAV-834  | Me                                 | Me             | H              | OMe                 | OMe                 | H                 | H              | H              | 3                     |
| PAV-854  | Me                                 | Cy-hex         | H              | OMe                 | OMe                 | H                 | H              | H              | > 1                   |
| PAV-530  | Me                                 | iPr            | H              | OMe                 | OMe                 | H                 | H              | H              | 1                     |
| PAV-835  | Me                                 | cyPr           | H              | OMe                 | OMe                 | H                 | H              | H              | < 1                   |
| PAV-895  | Me                                 | cyPr           | H              | OMe                 | Me                  | H                 | H              | H              | 2                     |
| PAV-039  | Me                                 | cyPr           | H              | OMe                 | OMe                 | H                 | H              | F              | 1                     |
| PAV-896  | Me                                 | cyPr           | H              | Me                  | OMe                 | H                 | H              | H              | 1.5                   |
| PAV-700  | Me                                 | cyPr           | H              | Cl                  | OMe                 | H                 | H              | H              | 2                     |
| PAV-235  | Me                                 | cyPr           | H              | F                   | OMe                 | H                 | H              | H              | 0.2                   |
| PAV-944  | Me                                 | cyPr           | H              | OMe                 | CF <sub>3</sub>     | H                 | H              | H              | 0.2                   |
| PAV-901  | Me                                 | cyPr           | H              | CF <sub>3</sub>     | OMe                 | H                 | H              | H              | 0.3                   |
| PAV-671  | Me                                 | cyPr           | H              | H                   | Cl                  | OCF <sub>3</sub>  | H              | H              | 0.05                  |
| PAV-774  | Me                                 | cyPr           | H              | Cl                  | OCF <sub>3</sub>    | H                 | H              | H              | 0.2                   |
| PAV-431  | Me                                 | cyPr           | H              | OMe                 | OCF <sub>3</sub>    | H                 | H              | H              | < 0.1                 |
| PAV-528  | Me                                 | cyPr           | H              | OCHF <sub>2</sub>   | OCHF <sub>2</sub>   | H                 | H              | H              | < 0.1                 |
| PAV-877  | Me                                 | cyPr           | H              | H                   | Me                  | OCHF <sub>2</sub> | Me             | H              | > 2                   |

108

109 **Legend to Figure 1.** A. Output of the moderate throughput CFPSA screen involving FLUV  
 110 nucleoprotein, culminating in three chemotypes validated against infectious virus, one of which was most  
 111 extensively advanced and is presented here. B. Initial hit (PAV-770) of this chemotype in the plate screen  
 112 showing dose-dependent titration of FLUV RFUs (left, reflecting inhibition of np  
 113 multimerization/assembly) with no effect on eGFP RFUs (right, reflecting inhibition of protein synthesis).

114 C. Markush structure of the lead series. D. Initial structure-activity relationship based on assessment of  
 115 FLUV infectivity in MDCK cells treated with these analogs.  
 116

117 Early promising compounds were counter-screened in mammalian cells against members of  
 118 several unrelated viral families causing respiratory disease including human rhinovirus (HRV) bovine  
 119 coronavirus (BoCoV), and murine herpesvirus (MHV), and were found to have activity comparable to  
 120 that observed for FLUV (Figure 2).

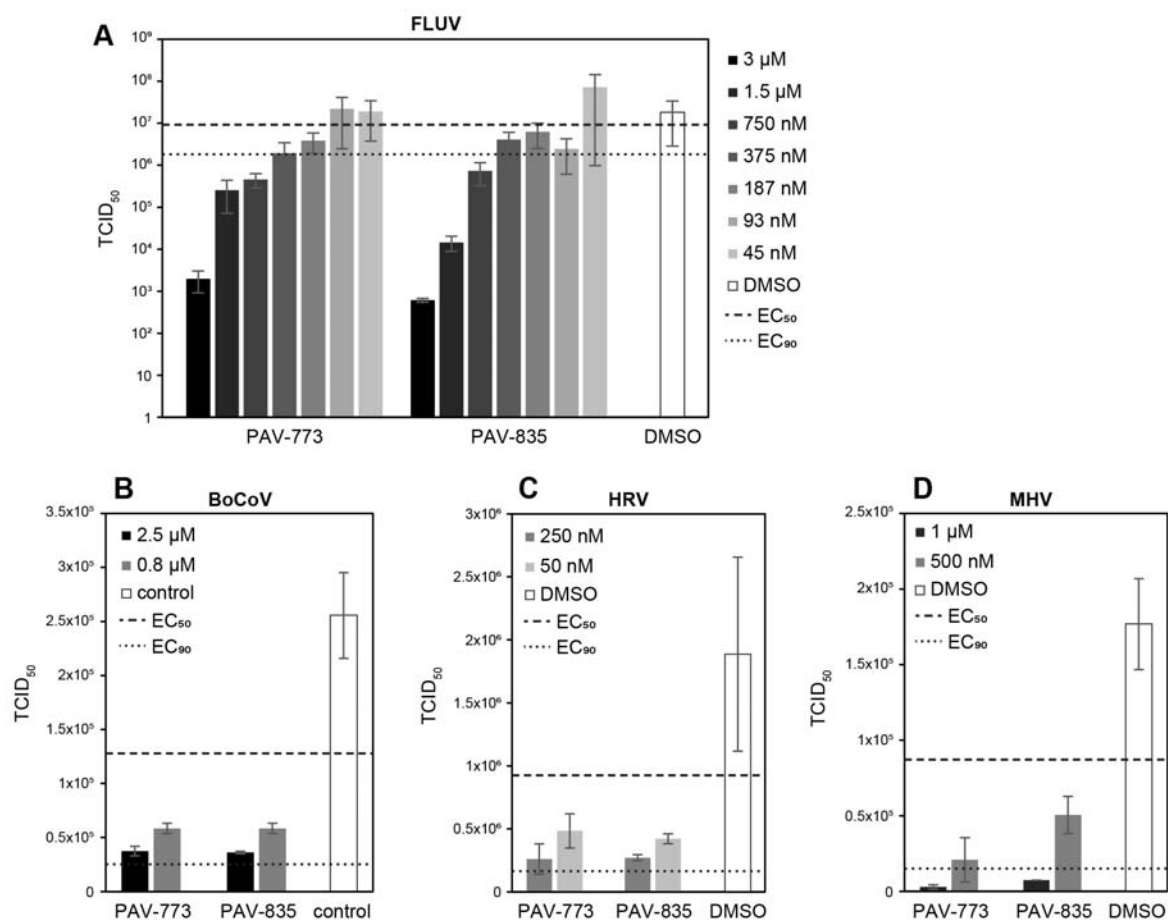

121

122 **Legend to Figure 2.** Assessment of pan-respiratory antiviral activity of early compounds PAV-773 and  
 123 PAV-835, determined by TCID<sub>50</sub>. Data shown are the averages of three biological replicates; error bars  
 124 indicate standard error; DMSO is included as the vehicle control. (A) FLUV A/WSN/33 in MDCK cells.  
 125 (B) BoCoV (BRCV-OK-0514-2) in HRT-18G cells, (C) HRV-16 in H1-HeLa cells, (D) MHV-68 in  
 126 BHK-2 cells. Dashed line is the EC<sub>50</sub>. Dotted line is the EC<sub>90</sub>.

127

128

129 *Assembly modulator compounds display a barrier to viral drug resistance development*

130  
131 Development of viral resistance has long been an Achilles heel of antiviral therapeutics (Nijhuis  
132 et al., 2009). Activity against FLUV provided the opportunity to compare early assembly modulators head  
133 to head with Oseltamivir, an antiviral small molecule targeting FLUV neuraminidase, which is known to  
134 select for viral resistance mutants (McKimm-Breschkin, 2013). Both PAV-835 and PAV-333 (a  
135 structurally unrelated assembly modulator chemotype), showed a significant barrier to development of  
136 resistance by FLUV (Table 1). The study was discontinued after the 7th passage, as the positive control  
137 Oseltamivir had substantially lost its antiviral activity.

138

|                    |                         | <b>percent<br/>reduction<br/>in<br/>infection</b> |
|--------------------|-------------------------|---------------------------------------------------|
| <b>Oseltamivir</b> | passage 0 at 30 $\mu$ M | 91                                                |
|                    | passage 7 at 30 $\mu$ M | 21.4                                              |
| <b>PAV-835</b>     | passage 0 at 3 $\mu$ M  | 98.9                                              |
|                    | passage 7 at 3 $\mu$ M  | 91.9                                              |
| <b>PAV-333</b>     | passage 0 at 3 $\mu$ M  | 94.5                                              |
|                    | passage 7 at 3 $\mu$ M  | 92.5                                              |

139  
140 **Legend to Table 1.** Evidence for a barrier to resistance development. MDCK cells were infected with  
141 FLUV (A/WSN/33) in the presence of Oseltamivir (935 nM to 30  $\mu$ M), PAV-835 (93.5 nM to 3  $\mu$ M), or  
142 PAV-333 (93.5 nM to 3  $\mu$ M). From passage to passage, drug concentrations were increased over the  
143 indicated ranges to encourage selection for resistance mutants. An initially Oseltamivir-sensitive FLUV  
144 strain became largely resistant after passage 7. In contrast, the two assembly modulator compounds PAV-  
145 835 and PAV-333 showed minimal loss of drug sensitivity.

146

147 *Validation of early compounds in animals*

148 Activity of a drug-like compound against such different viral families including viruses with  
149 RNA vs DNA genomes, and both enveloped and non-enveloped viruses, is unprecedented, so we sought  
150 early validation of its significance in animals. Compounds PAV-773 and PAV-835 were assessed in  
151 outbred pigs randomized within each litter into control and treatment groups and infected with porcine



152 epidemic diarrhea virus (PEDV), a coronavirus (Jung et al., 2020). Both compounds conferred a mortality  
 153 benefit (Figure 3A). Notably, in the subset of litters in which all control animals died (i.e. severe disease),  
 154 the treatment limb showed the same survival rate as that of the full treated population. Thus, efficacy of  
 155 these compounds was not limited to mild disease—a property caveat for advancement of an antiviral drug  
 156 for a disease with both mild and severe manifestations in different subpopulations, as is the case for  
 157 SARS-CoV-2 (Gao et al., 2021). While the PEDV trial only assessed survival, a subsequent more  
 158 advanced analog, PAV-431, was tested in cotton rats (Bem et al., 2011) infected with respiratory  
 159 syncytial virus (RSV), a paramyxovirus, to assess viral titer (Figure 3C). A small but statistically  
 160 significant drop in RSV titer was observed with drug treatment versus vehicle control. This indicated that  
 161 the antiviral activity observed in cell culture would manifest in animals by both of the two metrics of  
 162 interest: survival (including of a severe subset of an actual disease) and viral titer (in an animal model for  
 163 a second viral family).

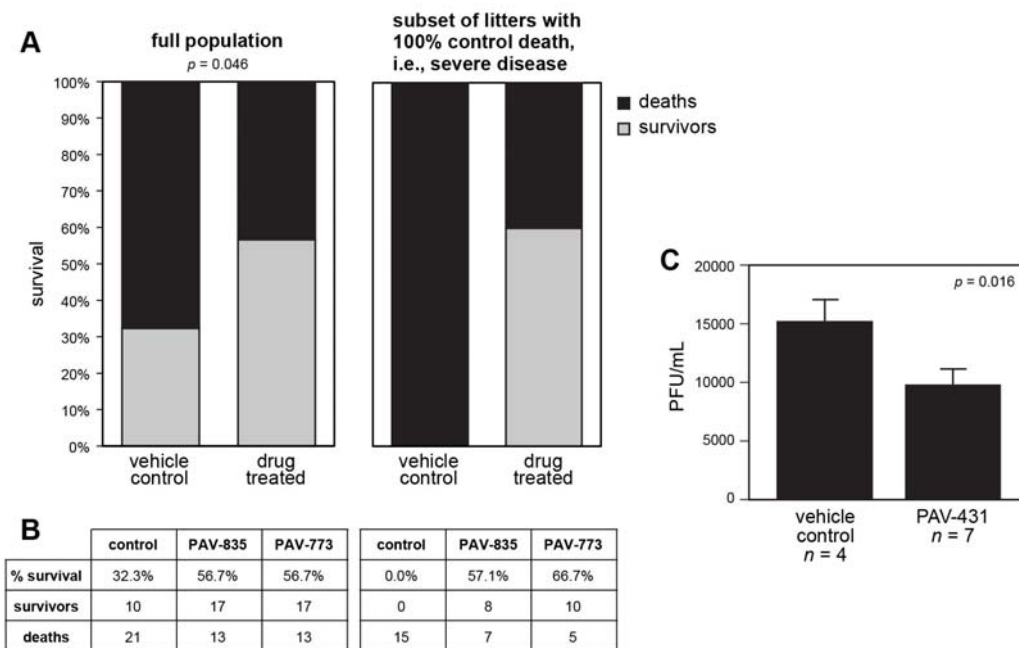

164

165 **Legend to Figure 3.** Early analogs validated in animal efficacy trials. (A-B) PEDV pig trial, evaluated by  
 166 survival. (A) Assembly modulator compounds demonstrated efficacy against both mild and severe  
 167 disease. As PAV-773 and PAV-835 showed equal efficacy, they have been combined (Fisher exact test  $p$   
 168 = 0.046). The left panel shows percent survival for all animals in the study. The right panel shows the  
 169 subset of litters in which all control animals (treated with vehicle only) died. (B) Breakdown of survival



170 for PAV-773 and PAV-835 separately for both the total population and the severe disease subset, where  $p$   
171 = 0.002 and  $p = 0.004$ , respectively. This breakdown reveals the compounds to be as potent against mild  
172 disease (groups in which there were vehicle-only survivors) as in severe disease (groups in which there  
173 were no vehicle-only survivors). (C) RSV cotton rat trial, evaluated by day 5 lung viral titer determined  
174 by plaque assay. A significant drop in viral titer was observed with PAV-431 treatment (unpaired  $t$ -test  $p$   
175 = 0.016). Data shown are averages; error bars indicate standard error.  
176

177 *Antiviral assessment against a wide range of respiratory viruses including SARS-CoV-2*

178 Further studies with PAV-431 confirmed its activity against members of the six viral families  
179 causing > 95% of human respiratory disease (Figure 4A). Notably, PAV-431 shows no significant  
180 activity against rabies virus, suggesting specificity for a target present in a subset of viral families that  
181 includes the respiratory viruses. Upon onset of the COVID-19 pandemic, further studies in mammalian  
182 cells revealed activity of PAV-431 against multiple variants of SARS-CoV-2 (Figure 4B).

183

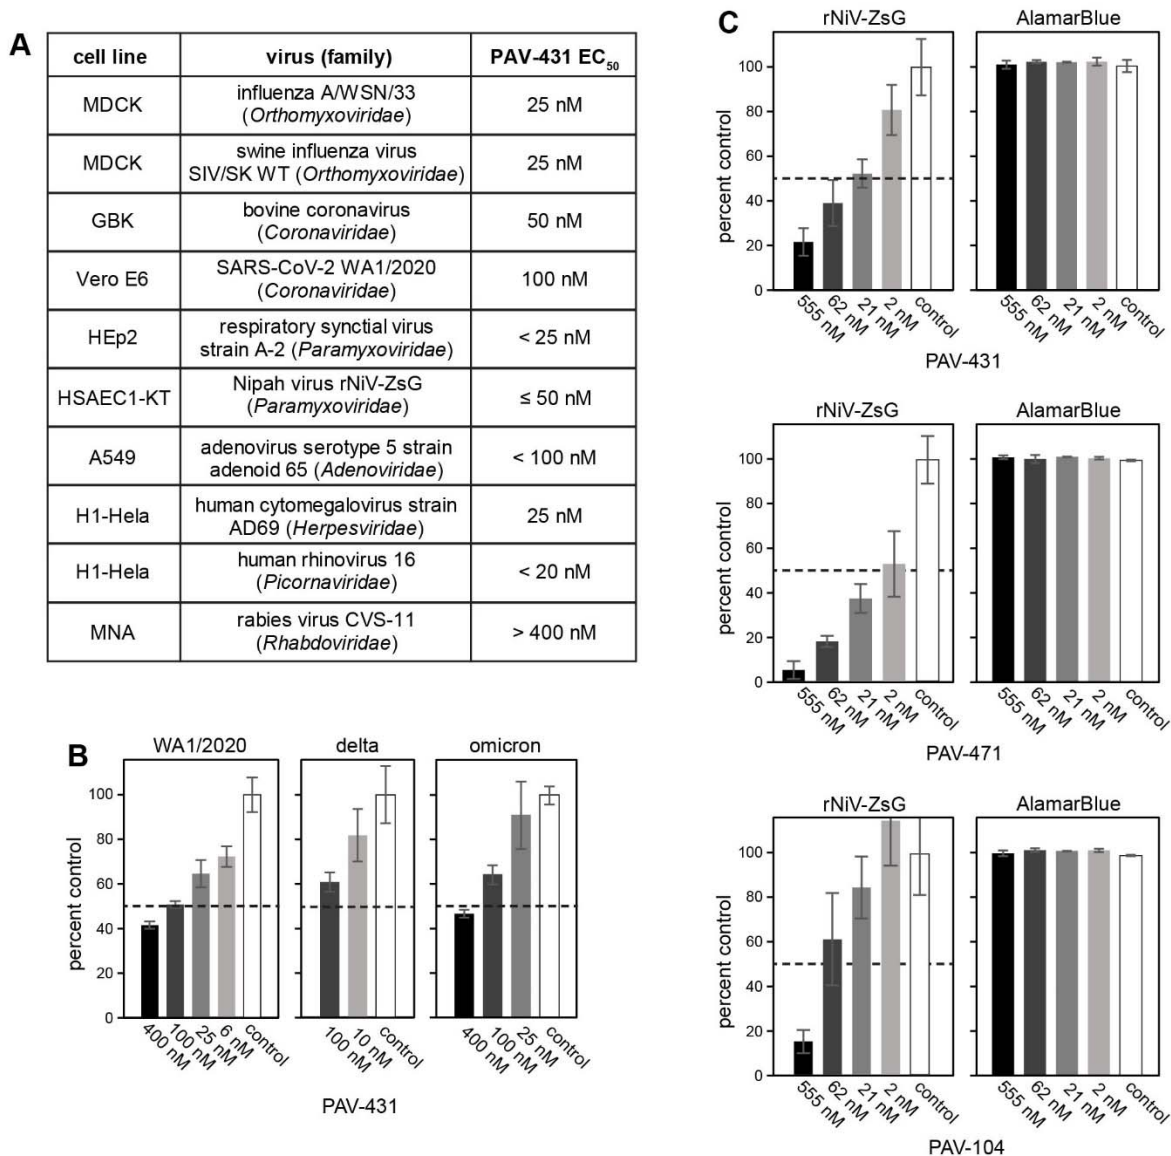

184  
 185 **Legend to Figure 4.** Pan-respiratory antiviral activity. (A) Efficacy of PAV-431 against each respiratory  
 186 viral family in cell culture. (B) Dose-dependent antiviral activity of PAV-431 against multiple SARS-  
 187 CoV-2 strains: (WA1/2020, lineage A) in Vero E6 cells, determined by plaque assay, delta variant  
 188 (lineage B.1.617.2) and omicron variant (lineage B.A.1) in Calu-3 cells determined by qPCR  
 189 measurement of the SARS-CoV-2 E gene and/or TCID<sub>50</sub>. Data shown are the averages of three biological  
 190 replicates; error bars indicate standard error; DMSO is included as the vehicle control. (C). Dose-  
 191 dependent activity of PAV-431 and advanced analogs PAV-471 and PAV-104 against Nipah virus of the  
 192 *Paramyxoviridae* family in primary-like human small airway epithelial cells (HSAEC1-KT)(Lo et al.,  
 193 2014; Welch et al., 2020). Alamar Blue assessment of cytotoxicity shows no toxicity up to 5μM tested in  
 194 5mM glucose-supplemented minimum essential medium, so all therapeutic indices > 100.  
 195

196 Translation of antiviral treatments for human therapeutics presents a further challenge because  
 197 animal models do not accurately reproduce human disease (Movia and Prina-Mello, 2020). It has been

198 proposed that the best predictor of human therapeutics is to take healthy human lung tissue from  
199 transplant donors, isolate primary bronchial epithelial cells, culture them to an air-liquid interface with  
200 differentiation to achieve polarity, tight junctions, motile cilia and mucus production, reproducing the  
201 relevant characteristics of the true target organ (Michi and Proud, 2021). The antiviral small molecule  
202 chemotype was assessed in this manner.

203

#### 204 *Efficacy in primary human airway epithelial cells at air-liquid interface*

205 Primary human bronchial epithelial cells grown at an air-liquid interface represents the human  
206 airway with high fidelity including for studies of antiviral activity against SARS-CoV-2 (Fulcher and  
207 Randell, 2013; Ingber, 2020; Loo et al., 2020). In three of three lung donors whose bronchial epithelial  
208 cells were cultured to an air-liquid interface, infected with SARS-CoV-2, and treated with PAV-431,  
209 approximately 90% or more of viral load was eliminated compared to treatment with vehicle (Figure 5).  
210 Another more advanced analog, PAV-471 is also compared and shown to have significantly greater  
211 potency than PAV-431. It is notable that this *ex vivo* gold standard of translation to human therapeutics  
212 demonstrated even greater potency of both PAV-431 and PAV-471 than was observed in transformed  
213 cells.

214

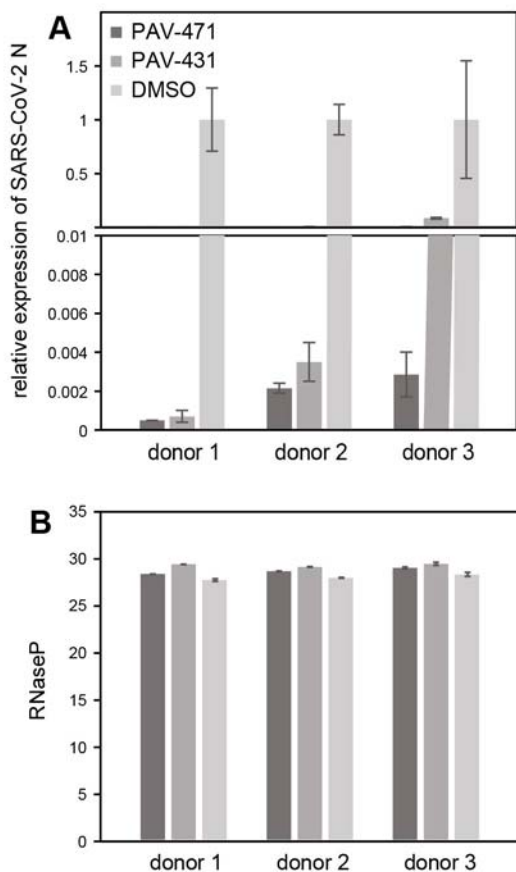

215

216 **Legend to Figure 5.** A. Assembly modulator compounds inhibit SARS-CoV-2 (gamma variant, lineage  
217 P.1) replication in primary human airway epithelial cells grown at an air-liquid interface, determined by  
218 qPCR measurement of the SARS-CoV-2 N gene. Data shown are the averages of two biological  
219 replicates; error bars indicate standard error; DMSO is included as the vehicle control. B. No significant  
220 toxicity was observed by assessment of levels of RNase P.  
221

222 *Drug target is a virally modified host multi-protein complex*

223 Since the assembly modulators were discovered using a phenotypic CFPSA screen and were  
224 advanced based on structure-activity-relationship improvement of antiviral activity in mammalian cell  
225 culture, we as yet had no specific knowledge of the drug target. To identify the drug target, we developed  
226 a variation on the theme of drug resin affinity chromatography (DRAC) (Tanaka, 2009). PAV-431 was  
227 attached to a resin via a side group determined by structure-activity-relationship exploration to be non-  
228 essential for biological activity (Supplemental Figure S1 B). Cellular extracts were applied to drug resin  
229 columns to bind the target, washed, and then eluted with free drug compared to identical treatment of

230 control resin lacking the drug. These free drug eluates were found to contain a substantial set of proteins  
231 not observed with drug elution from the control resin. Early in the course of these studies, we discovered  
232 that conducting the procedure at temperatures between 22°C to 34°C rather than at 4°C, and  
233 supplementing with nucleotide triphosphates and an energy regenerating system, greatly enhanced target  
234 yield (Supplementary Figure S2). This distinctive energy-supplemented DRAC approach was given the  
235 acronym eDRAC.

236 *f*We used a PAV-431 drug resin to prepare eDRAC-free drug eluates which were then analyzed  
237 by tandem mass spectrometry (MS-MS) and by western blotting (WB) using commercial monospecific  
238 antibodies. Parallel MS-MS of eDRAC-free drug eluates from control resins lacking the drug affinity  
239 ligand demonstrated the high specificity of the set of proteins recovered from the drug resin, which  
240 notably included a number of known components of the host interactomes associated with respiratory  
241 viral lifecycles (Gordon et al., 2020b, 2020a; Perrin-Cocon et al., 2020; Watanabe et al., 2014) along with  
242 many members of host innate immune interactomes including that of autophagy (Mao et al., 2019; Zhao  
243 et al., 2021) (Figure 6A and Supplemental Figure S3). We compared eDRAC eluates from extracts of  
244 uninfected MRC-5 cells, BoCoV-infected or FLUV-infected MRC-5 cells, and infected MRC-5 cells  
245 treated with PAV-431 (Figure 6B-E). Infected cell eluates showed a striking enrichment of subsets of the  
246 proteins present, and substantial restoration upon drug treatment to that observed from uninfected cells,  
247 even more so for BoCoV infection than for FLUV infection (Supplementary Figure S3).

248 To provide independent corroboration of the conclusions from these eDRAC MS-MS studies,  
249 PAV-431 analogs were synthesized in which a biotin and a diazirine UV photocross-linking moiety were  
250 attached at the same position to which the compound had been attached to the resin for eDRAC analysis  
251 (Supplementary Figure S1C). After UV crosslinking to the protein nearest the assembly modulator,  
252 streptavidin precipitation isolated the relevant multi-protein complex (co-precipitated under non-  
253 denaturing conditions). A number of the proteins identified by MS-MS and/or Western blot in eDRAC  
254 free drug eluates were confirmed in this way to be part of a multi-protein complex, including  
255 p62/SQSTM1, VCP/p97, and CAPN2 (Figure 6G).

256

257 *Identification of the drug-binding protein within the target multi-protein complex*

258           If, subsequent to UV light exposure, the sample was denatured and then subjected to streptavidin  
259 precipitation, only the nearest neighbor protein(s) covalently bound to the drug-biotin conjugate will be  
260 found in the streptavidin precipitate. One protein, 14-3-3, a member of the 14-3-3 family of allosteric  
261 modulators implicated in the pathophysiology of many different respiratory viral families (Gupta et al.,  
262 2020; Jia et al., 2017; Liu et al., 2021; Obsilova and Obsil, 2020; Pei et al., 2011; Stevers et al., 2018;  
263 Tugaeva et al., 2021) was present on streptavidin precipitation of samples prepared by both native and  
264 denaturing conditions, identifying 14-3-3 as the direct drug-binding protein.

265           A notable observation was that the fraction of each of these proteins, including 14-3-3, found in  
266 the target complex was extremely small (< 5%) compared to the total amount of that protein present in the  
267 starting cellular extract (Figure 6G). The fidelity of this surprising observation was confirmed by rerun of  
268 extract eDRAC flow through onto a second eDRAC column demonstrating complete depletion of the  
269 target with no further binding to the second eDRAC column (Supplementary Figure S4). The flow  
270 through from the control column, from which the target had not been depleted, when analyzed on a  
271 second eDRAC column, consistently revealed that the small fraction of the set of target proteins could  
272 still be bound and eluted with free drug (Supplementary Figure S4). Thus, the small amount of 14-3-3  
273 and other proteins identified in the target multi-protein complex from the initial eDRAC column are  
274 unique in their biochemical behavior, comprising a distinctive subset present in the form of the identified  
275 target multi-protein complex, and distinct from the > 95% of the individual protein components that do  
276 not bind the drug resin, even under eDRAC conditions. The implications of this important finding are  
277 discussed below.

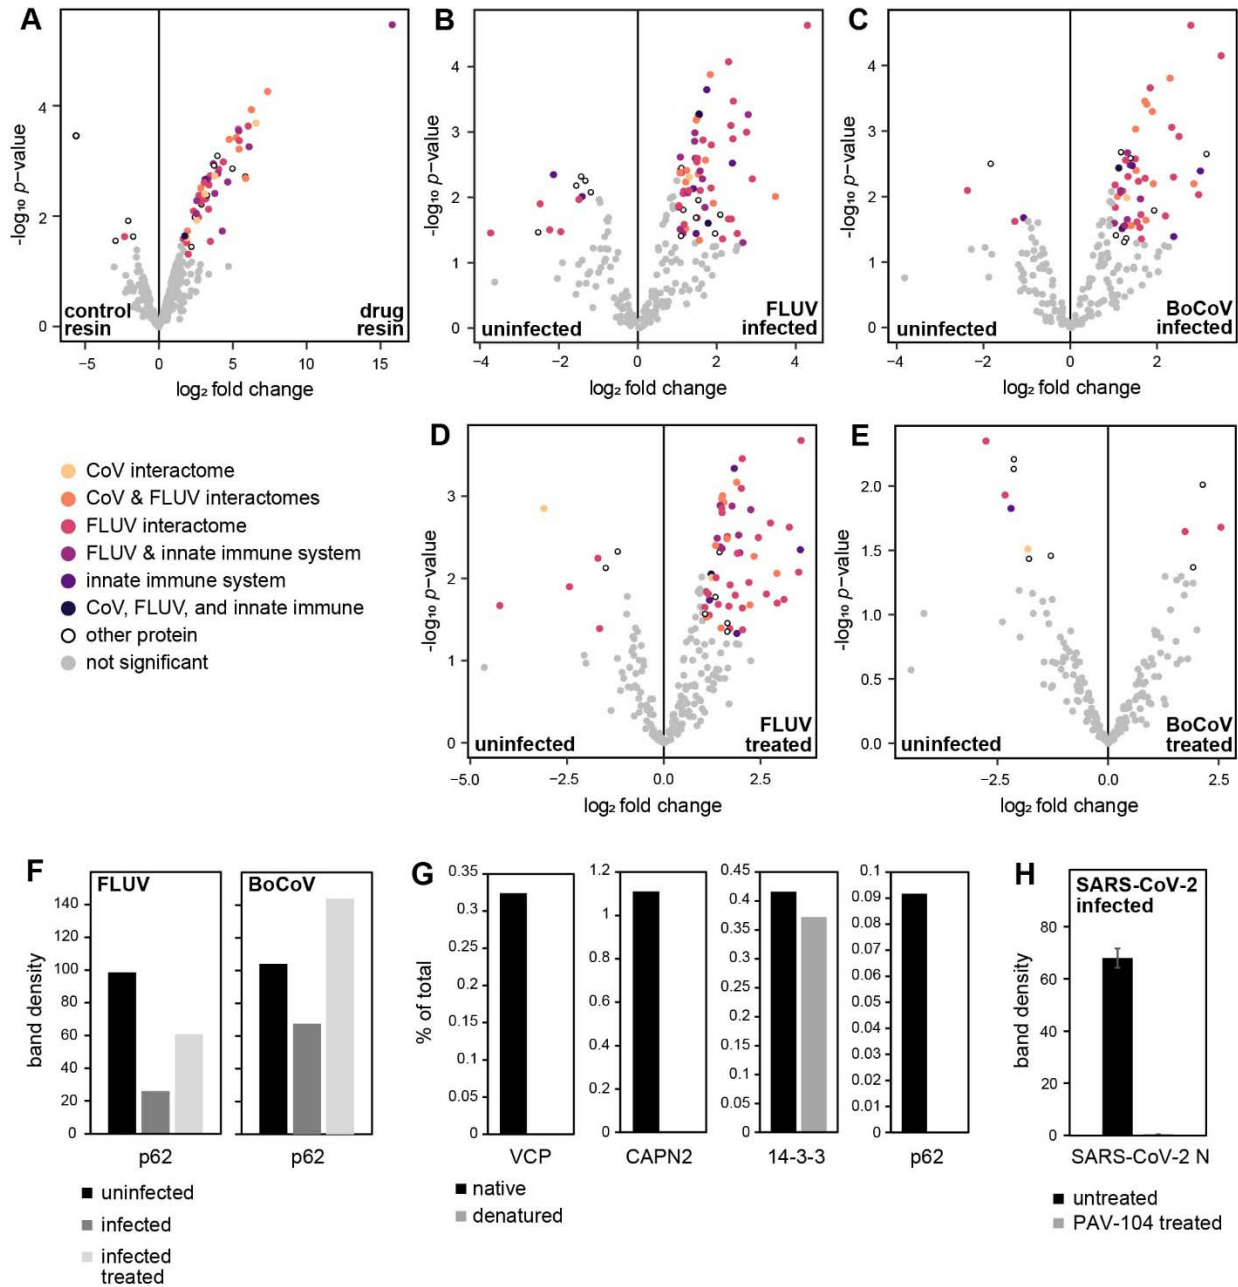

278

279 **Legend to Figure 6.** Drug target is a host multi-protein complex modified by viral infection and restored  
 280 with drug treatment. (A-E) Volcano plots visualizing the protein composition of the target complex  
 281 determined by MS-MS on triplicate eDRAC eluates from extracts of MRC-5 cells that were either  
 282 uninfected, infected with FLUV or BoCoV, or infected and treated with PAV-431. Significant proteins  
 283 ( $|\log_2 \text{fold change}| > 1$  and  $p\text{-value} < 0.05$ ) are colored based on their known involvement in the CoV,  
 284 FLUV, and innate immune system interactomes and listed in Supplementary Figure S3. (A) Comparison  
 285 between control resin and PAV-431 drug resin demonstrates drug specificity of the target complex. (B-C)  
 286 Infection with FLUV (B) or BoCoV (C) modifies the target complex. (D-E), Treatment with PAV-431  
 287 restores the target to the uninfected state, partially for FLUV (D) and almost completely for BoCoV (E).  
 288 (F) eDRAC eluates from MRC-5 cells (left) and HRT-18G cells (right), uninfected or infected with either



289 FLUV (left) or BoCoV (right), analyzed by SDS-PAGE and WB for target component p62. In both cases,  
290 viral infection resulted in a diminution of p62, which was restored by treatment with PAV-431 (right) and  
291 PAV-818 (left). (G) Crosslinked eDRAC eluates from pig lung extract co-precipitated under native or  
292 denaturing conditions and analyzed by SDS-PAGE and WB for target components p62, VCP, CAPN2,  
293 and 14-3-3. Presence under both conditions identifies 14-3-3 as the direct drug binding protein, while loss  
294 under denaturing conditions identifies the others as more distal components of the complex associated  
295 with the drug indirectly via other proteins in the complex that are associated with the direct-binding  
296 protein 14-3-3. (H) SARS-CoV-2 infected an PAV-431-treated cell lysate subjected to PAV-431  
297 photocross-linking and streptavidin precipitation under non-denaturing conditions. A-E and H show the  
298 statistical significance of the findings, F and G show representative individual experiments. Drug  
299 concentration for treatment of infected cells in H was 100nM.  
300

### 301 *Target Product Profile*

302           Given the striking pan-respiratory antiviral activity shown, we chose to more fully assess the  
303 target product profile of PAV-431, that is, to determine its drug-like properties by the standard criteria for  
304 advancement of a drug candidate (Breder et al., 2017). PAV-431 displayed promising properties including  
305 being negative for hERG channel inhibition, negative for mutagenicity by the Ames test, negative for  
306 significant cytochrome P-450 inhibition, and without substantial Cerep panel enzyme inhibition liabilities  
307 (Supplementary Figure S5). PAV-431 itself was disqualified from further consideration for human pan-  
308 respiratory therapeutics due to an insufficient safety profile in rodents (Supplementary Figure S6).  
309 Nevertheless, these studies demonstrated that this chemotype has reasonable drug-like properties and  
310 lacks various other liabilities. Molecular properties relating to Lipinski's rule of five are presented in  
311 Supplementary Table S1. Going forward, lead series advancement efforts focused on eliminating host  
312 toxicity.

313

### 314 *Lead series advancement lowers host toxicity while maintaining pan-respiratory viral family antiviral* 315 *activity*

316           Additional analogs were synthesized and screened for antiviral activity and host toxicity as  
317 assessed by maximal tolerated dose (MTD) in mice. Two analogs in particular were notable in  
318 comparison to PAV-431. PAV-471 was substantially more active, including in human bronchial epithelial  
319 cells cultured to an air-liquid interface (Figure 5), but also more toxic in mice (Supplementary Figure S6).

320 PAV-104 however, was both more active and less toxic than PAV-431, with improved pharmacokinetic  
321 properties making it suitable for once daily dosing orally, compared to PAV-431 (Figure 7). The non-  
322 toxicity of PAV-104 was confirmed by numerous criteria. These included maximum tolerated dose with  
323 no observable effect level of 15 mg/kg or mild toxicity of 20mg/kg by intraperitoneal route in mice, and  
324 no observable adverse effects at < 75 mg/kg by and only mild toxicity at > 250mg/kg by oral route in rats  
325 (Figure 7A); acute repeat dose toxicology in rats with a 50mg/kg oral dose daily for 7 days showed no  
326 toxic signs of any sort, including behavioral, clinical chemistry, hematology, or gross pathology  
327 assessment. Trough plasma levels on the 7<sup>th</sup> day exceeded EC<sub>50</sub> by >100x (Figure 7B). Pharmacokinetic  
328 studies in rats demonstrated further properties desired for a clinical candidate including good oral  
329 bioavailability (32%), half-life (9 hours), and lung exposure (2.4x plasma level at 24 hours) (Figure 7A).  
330

331

**A**

|                              |                                                                  | PAV-773           |                                       |                   | PAV-836 |                                     | PAV-431 |                                       | PAV-471   |        | PAV-104                              |      |                                      |                                                           |
|------------------------------|------------------------------------------------------------------|-------------------|---------------------------------------|-------------------|---------|-------------------------------------|---------|---------------------------------------|-----------|--------|--------------------------------------|------|--------------------------------------|-----------------------------------------------------------|
| mouse maximum tolerated dose | safe dose route-dosage (mg/kg)                                   | -                 | IP-5                                  | -                 | -       | IP-1                                | -       | IP-5                                  | -         | -      | IP-1                                 | -    | IP-15                                | PO-50                                                     |
|                              | toxic dose route-dosage (mg/kg)                                  | -                 | IP-15                                 | -                 | -       | IP-15                               | -       | IP-10                                 | -         | -      | IP-2                                 | -    | IP-20                                | PO-250                                                    |
| repeat dose toxicology       | route-dosage (mg/kg)                                             | -                 | IP-5 <sup>a</sup>                     | -                 | -       | IP-1 <sup>a</sup>                   | -       | IP-2 <sup>a</sup>                     | -         | -      | -                                    | -    | -                                    | PO-50 <sup>b</sup>                                        |
|                              | body weight, clinical signs, histopathology, clinical parameters | -                 | NAD/NSSD                              | -                 | -       | NAD/NSSD                            | -       | NAD/NSSD                              | -         | -      | -                                    | -    | -                                    | NAD/NSSD                                                  |
| rat PK                       | route-dosage (mg/kg)                                             | IV-1 <sup>c</sup> | IP-5 <sup>c</sup>                     | PO-5 <sup>c</sup> | IV-0.2  | IP-1                                | IV-1    | IP-5                                  | PO-5      | IV-0.2 | IP-1                                 | IV-1 | IP-5                                 | PO-20                                                     |
|                              | AUC <sub>last</sub> (nM.h)                                       | 2287              | 733                                   | 253               | 428     | 1043                                | 831     | 2464                                  |           | 108    | 371                                  | 543  | 2510                                 | 3247                                                      |
|                              | AUC <sub>inf</sub> (nM.h)                                        | ND                | ND                                    | ND                | 428     | 1047                                | 926     | 2499                                  |           | 135    | 387                                  | 559  | 2656                                 | 3620                                                      |
|                              | C <sub>max</sub> (nM)                                            | ND                | 1035                                  | 51                | 1608    | 2842                                | 685     | 793                                   |           | 152    | 550                                  | 1379 | 2243                                 | 1417                                                      |
|                              | T <sub>max</sub> (h)                                             | ND                | 0.08                                  | 4                 | 0.03    | 0.08                                | 0.08    | 0.25                                  |           | 0.08   | 0.25                                 | 0.08 | 0.25                                 | 0.5                                                       |
|                              | t <sub>1/2</sub> (h)                                             | ND                | ND                                    | ND                | 0.5     | 0.4                                 | 12      | 5                                     | low conc. | 4      | 2                                    | 2    | 7                                    | 9                                                         |
|                              | CL (mL/min)                                                      | 1.3               | -                                     | -                 | 25      | -                                   | 49      | -                                     |           | 45     | -                                    | 51   | -                                    | -                                                         |
|                              | V <sub>z</sub> (L/Kg)                                            | 13.3              | -                                     | -                 | 0.5     | -                                   | 32      | -                                     |           | 12     | -                                    | 4    | -                                    | -                                                         |
|                              | F (%)                                                            | -                 | 7                                     | 2.2               | -       | 49                                  | -       | 59                                    |           | -      | 69                                   | -    | 95                                   | 32                                                        |
| rat uptake                   | route-dosage (mg/kg)                                             | -                 | IP-5 <sup>c</sup>                     | -                 | -       | IP-1 <sup>c</sup>                   | -       | IP-5                                  | -         | -      | IP-1                                 | -    | IP-5                                 | PO-20                                                     |
|                              | concentration in lungs (nM)                                      | -                 | 866 <sup>d</sup><br>109 <sup>f</sup>  | -                 | -       | 98 <sup>e</sup><br>5 <sup>g</sup>   | -       | 1224 <sup>e</sup><br>355 <sup>g</sup> | -         | -      | 739 <sup>e</sup><br>175 <sup>g</sup> | -    | 160 <sup>e</sup><br>485 <sup>g</sup> | 306 <sup>e</sup><br>113 <sup>g</sup><br>53 <sup>h</sup>   |
|                              | concentration in brain (nM)                                      | -                 | 2148 <sup>d</sup><br>169 <sup>f</sup> | -                 | -       | 178 <sup>e</sup><br>20 <sup>g</sup> | -       | 1416 <sup>e</sup><br>479 <sup>g</sup> | -         | -      | 334 <sup>e</sup><br>69 <sup>g</sup>  | -    | 17 <sup>e</sup><br>BLOQ <sup>g</sup> | 26 <sup>e</sup><br>BLOQ <sup>g</sup><br>BLOQ <sup>h</sup> |
|                              | concentration in plasma (nM)                                     | -                 | 1657 <sup>d</sup><br>250 <sup>f</sup> | -                 | -       | 181 <sup>e</sup><br>18 <sup>g</sup> | -       | 834 <sup>e</sup><br>333 <sup>g</sup>  | -         | -      | 265 <sup>e</sup><br>40 <sup>g</sup>  | -    | 397 <sup>e</sup><br>261 <sup>g</sup> | 1011 <sup>e</sup><br>371 <sup>g</sup><br>22 <sup>h</sup>  |

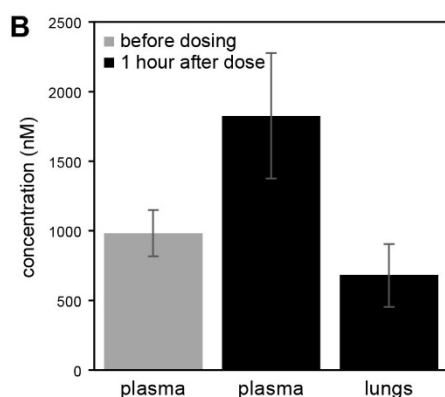

332

333

334 **Legend to Figure 7.** Pharmacokinetic and toxicological assessment of the lead series in BALB/c mice  
 335 and Sprague Dawley rats. (A) Summary of results. IV, intravenous; IP, intraperitoneal; PO, per oral; PK,  
 336 pharmacokinetics; AUC<sub>last</sub>, area under the curve from time zero to the last quantifiable concentration;  
 337 AUC<sub>inf</sub>, area under the curve vs. time curve extrapolated to infinity; C<sub>max</sub>, peak plasma concentration;  
 338 T<sub>max</sub>, time of peak concentration observed; t<sub>1/2</sub>, terminal half-life; CL, steady-state clearance; V<sub>z</sub>, volume  
 339 of distribution; F, fraction bioavailability; NAD, no abnormality detected; NSSD, no significant statistical  
 340 difference; BLOQ, below level of quantification; ND, not determined. Pharmacokinetic parameters were  
 341 determined using WinNonlin software. (B) PAV-104 levels following acute repeat dose toxicology  
 342 evaluation in Sprague Dawley rats with a daily oral dose of 50 mg/kg for 7 days. Trough plasma levels  
 343 exceed EC<sub>50</sub> by ~100 fold. Data shown are the averages of 5 animals; error bars indicate standard  
 344 deviation.

345

346 A body of literature has implicated 14-3-3 proteins, known to be allosteric modulators (Obsilova  
347 and Obsil, 2020), as interacting with SARS-CoV-2 N protein (Tugaeva et al., 2021). Based on those  
348 studies we predicted that PAV-104, while directly crosslinked to 14-3-3 in a complex containing other  
349 proteins including CAPN2 and VCP, should be indirectly associated with SARS-CoV-2 N protein by  
350 virtue of transient protein-protein interactions in the host multi-protein complex drug target, during capsid  
351 assembly. This was confirmed with extracts of Calu-3 cells infected with SARS-CoV-2 vs infected and  
352 treated with PAV-104 at 100nM. As predicted, SARS-CoV-2 N co-precipitated with streptavidin under  
353 native conditions and was substantially diminished after 24 hrs of treatment with PAV-104 (Figure 6H).

354 Finally, to confirm the principle of pan-respiratory anti-viral activity for PAV-104, primary-like  
355 human small airway epithelial cells were infected with Nipah virus, a BSL-4 virus belonging to the  
356 *Paramyxoviridae* family designated by the WHO as a priority pathogen pandemic potential  
357 (“WORKSHOP ON PRIORITIZATION OF PATHOGENS,” 2015; “WHO publishes list of top emerging  
358 diseases likely to cause major epidemics,” 2015). Figure 4C demonstrates activity of PAV-431, PAV-471  
359 and PAV-104 against Nipah virus. The advanced analog PAV-104 with a strikingly improved safety  
360 profile, has maintained the pan-viral family activity for diverse respiratory viral families as observed for  
361 the earlier analogs PAV-773, PAV-835 and PAV-431.

362

## 363 Discussion

364 This antiviral chemotype, several of whose lead series compounds are studied here, exhibits  
365 remarkable features. These include activity across a broad range of respiratory viral families and a barrier  
366 to development of viral drug resistance. The antiviral activity was demonstrated both in cell culture and  
367 in animals. Cell culture studies, including in primary human bronchial epithelial cells cultured at an air-  
368 liquid interface and infected with SARS-CoV-2, confirmed the antiviral potency demonstrated in various  
369 cell lines, with members of six major respiratory viral families, by a variety of assay methods (Figures  
370 2,4,5). Animal studies, carried out on early analogs in the lead series, validated efficacy for survival in an

371 actual pig coronavirus disease (Figure 3A), and by viral load reduction in the cotton rat model of RSV  
372 infection (Figure 3B). A barrier to resistance development was demonstrated for an early analog on  
373 influenza compared to oseltamivir, which targets a viral gene product, and to which resistance rapidly  
374 developed (Table 1). It should be noted that structurally unrelated host-targeted assembly modulators  
375 potent against HIV have maintained a barrier to resistance development for the full 37 cycles of selection  
376 attempted (Reed et al., 2021). These findings suggest that the barrier to resistance development posed by  
377 host-targeted assembly modulators as a general therapeutic class may be substantial. Subsequently,  
378 through structure-activity relationship advancement, antiviral activity in cell culture against SARS-CoV-2  
379 has been increased >10x with the advent of analogs PAV-471 and PAV-104, the latter of which also  
380 displays pharmacokinetic properties and safety in rats worthy of continued advancement to investigational  
381 new drug (IND) enabling studies towards human therapeutics.

382 Target identification by DRAC revealed a previously undescribed multi-protein complex whose  
383 constituents include proteins implicated in diverse respiratory viral lifecycles. A number of the multi-  
384 protein complex constituent proteins are part of innate immune interactomes, including autophagy, all  
385 important for host antiviral defense (Deretic, 2021). Upon viral infection the composition of the target  
386 host multi-protein complex is shown to change, with increase in specific members of both the viral  
387 lifecycle and innate immune subsets of component proteins (Figure 6). One protein in particular,  
388 p62/SQSTM1, a key regulator of autophagy, is lost upon viral infection by both CoV and FLUV. This is  
389 consistent with the hypothesis that the virus has used deep evolutionary time and natural selection to  
390 identify a host allosteric site that allows it to both repurpose critical host machinery to viral replication  
391 and block autophagic host defenses. This chemotype appears to substantially reverse the virally induced  
392 changes of composition of the target host multi-protein complex for each of the different respiratory viral  
393 families studied.

394 Figure 8 summarizes our current working hypothesis for the dual modes of action of these drugs,  
395 including PAV-431 and PAV-104, namely, targeting an allosteric site important for both viral  
396 replication/blockade and decoupling/restoration of p62/SQSTM1, a mediator of host autophagic innate

397 immune defenses. That the drugs block viral replication is supported by the demonstrated drop in viral  
398 load by both plaque assay and TCID<sub>50</sub> in cell culture (Figure 4A). The interaction with the SARS-CoV-2  
399 N protein and its diminution upon drug treatment (Figure 6H) provides a structural basis for this  
400 functional observation, consistent with recent literature implicating transient interactions as druggable  
401 targets (Kii et al., 2016; Umezawa and Kii, 2021). The hypothesized restoration of autophagy by drug  
402 treatment is supported by the demonstration that p62/SQSTM1 is present in the target complex in  
403 uninfected cells, is lost from the complex upon viral infection, and is largely restored after 24hrs of drug  
404 treatment (Figure 6F).  
405

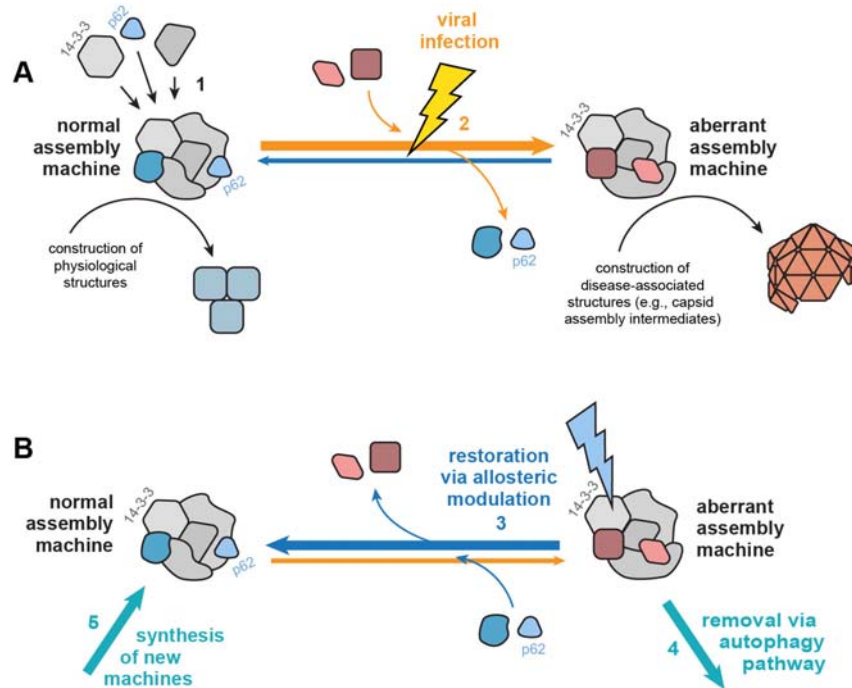

406  
407

408 **Figure 8.** Cartoon summarizing our working hypothesis on assembly modulation therapeutics. (A)  
409 Normal assembly machines are transient host multi-protein complexes that come together to carry out  
410 various events involved in the construction of physiological structures and maintenance of homeostasis  
411 (1). Viruses have evolved to co-opt the assembly machines of their hosts to meet their own needs,  
412 presumably through signaling pathway manipulation and/or allosteric site modulation (2). This results in  
413 the formation of aberrant assembly machines that do something they are not supposed to do (e.g. build a  
414 viral capsid) and perhaps fails to do something they are supposed to do (e.g. inform innate immunity that  
415 the cell is under viral attack) due to loss of autophagy regulator p62. The former action is reflected as  
416 viral replication and the latter action is reflected in the failure of autophagic innate immune defense. Both  
417 consequences manifest as disease and their molecular basis is the normal to aberrant change in assembly  
418 machine composition. (B) Treatment with assembly modulators results in elimination of aberrant

419 assembly machines and restoration of normal assembly machines. This could be a result of either direct  
420 action on the allosteric site (e.g. affecting protein-protein interactions such that the normal assembly  
421 machine is stabilized) or indirectly by activation of autophagy to destroy the aberrant assembly machines  
422 (4) followed by homeostatic feedback repopulation of normal assembly machines (5).  
423

424           Of the plethora of proteins found in the eDRAC eluate and photocross-link streptavidin  
425 precipitate, only 14-3-3 was found to be a direct drug-binding protein. 14-3-3 proteins have been  
426 implicated both as allosteric modulators of protein kinases (Obsilova and Obsil, 2020) and in direct  
427 interaction with SARS-CoV-2 N (Tugaeva et al., 2021), consistent with our findings. These changes in  
428 target multi-protein complex composition suggest that upon viral infection the multi-protein complex is  
429 repurposed from the role of a normal assembly machine performing transient functions that maintain host  
430 homeostasis, to an aberrant assembly machine that is involved in viral capsid assembly and is  
431 disconnected from host antiviral defense mechanisms such as autophagy. Upon assembly modulator drug  
432 treatment, both these features of infection are reversed, albeit more so for CoV infection than for FLUV  
433 infection at the 24h time point assessed. Whether that difference reflects a distinction intrinsic to those  
434 two viral families (*Coronaviridae* vs *Orthomyxoviridae*) or is simply a consequence of a different time  
435 course of viral-host interaction and reversal for these two viral families, remains to be determined. The  
436 present methods applied to study of multiple members of each viral family, and at other time points in the  
437 course of infection and drug treatment, should be able to clarify this issue. Regardless, the notion that one  
438 target can reverse both types of changes for multiple viral families is notable and likely contributes to the  
439 potency of this antiviral mechanism.

440           Why has this remarkable host targeted pan-respiratory antiviral mechanism been overlooked  
441 previously? The data presented suggest at least two reasons, both related to the unusual nature of the drug  
442 target. First, because the target is both transient and energy-dependent – not just for its action, but also for  
443 its formation. These features make it extremely difficult to detect by conventional proteomics (Aslam et  
444 al., 2017), limitations that were overcome by use of the CFPSA phenotypic screen to find the chemotype,  
445 and the eDRAC/photo cross-linking protocols used to characterize its target.



446           A second feature that made this antiviral mechanism hard to detect is the small percent of the  
447 total of each of the proteins that are present in the host multi-protein complex target, even with eDRAC  
448 enhancement. The burgeoning literature on “moonlighting” functions of innumerable proteins (Alpert et  
449 al., 2021; Bhutta et al., 2021; Copley, 2012; Jeffery, 2019) suggests that there are subsets of proteins,  
450 identical in amino acid sequence, performing different functions within cells. Whether such differences in  
451 function are due to differences in post-translational covalent modification (Liu et al., 2016; Song and Luo,  
452 2019; Xu et al., 2019), intrinsically unfolded domains that are templated by the other proteins with which  
453 the subset is associated (Uversky, 2016), or due to some other mechanism such as different pathways of  
454 biogenesis (Alpert et al., 2021; Lingappa et al., 2002; Williams and Dichtl, 2018) remains to be  
455 determined and likely will vary on a case-by-case basis.

456           Despite the ample evidence for protein functional heterogeneity in living cells as cited above,  
457 molecular genetic manipulation of coding sequences and recombinantly expressed protein remains the  
458 primary, and often exclusive, bases for most protein structural studies including of drug targets. The  
459 present data builds on the power of genetic studies, but calls exclusive use of that approach into question,  
460 not just for drug discovery, but also with regards to an understanding of biological regulation. This is  
461 because functionally distinct subsets of individual proteins, assembled co-translationally (Williams and  
462 Dichtl, 2018), perhaps in a contingent manner (Lingappa et al., 2002), are unlikely to be parsed by  
463 upstream genomic and transcriptomic analyses. New tools, such as the eDRAC and photocross-linking  
464 drug analog protocols used here, may facilitate the difficult but essential task of studying protein  
465 heterogeneity as expressed physiologically in cells and tissues. Other methods, including non-invasive  
466 chemical modification (Alpert et al., 2021) and conformation-specific monoclonal antibodies (Akuta et  
467 al., 2022; Leliveld and Korth, 2007), may also be valuable for this effort. This critique applies not just to  
468 exclusive use of methods such as siRNA knockdown and CRISPR that manipulate gene expression before  
469 protein biogenesis and assembly has occurred, but more generally to the use of recombinantly expressed  
470 protein as the substrate for structural and functional studies.

471           Perhaps the most remarkable of our findings is that members of such diverse viral families should  
472 have their replication effectively blocked by a single host-targeted small molecule. On the one hand, this  
473 implies a shared drug-binding protein. Most likely that shared drug target, a distinctive subset of the  
474 protein 14-3-3, is found in each of the different aberrant assembly machines generated by each of these  
475 diverse viral families from a common host multi-protein complex. We hypothesize that utilization of this  
476 single shared host multi-protein complex is a consequence of virus-host co-evolution. On the other hand,  
477 the data in Figure 6 suggests that different viral families can modify the same host multi-protein complex  
478 in which the direct drug target 14-3-3 is a component, in different ways. While this could be accounted  
479 for by various explanations, perhaps the most straightforward is as a manifestation of allostery (Fenton,  
480 2008; Motlagh and Hilser, 2012), given that the direct drug-binding protein, 14-3-3, is a known allosteric  
481 modulator (Obsilova and Obsil, 2020). The drugs described here could work by stabilization of the  
482 normal assembly machine, perhaps with re-activation of autophagy upon restoration of p62/SQSTM1 to  
483 the host multi-protein complex, thereby serving to eliminate aberrant assembly machines. Alternatively,  
484 direct binding of the drug to the allosteric site within the aberrant assembly machine could mediate in real  
485 time the change in equilibrium described in Figure 8. These and other models remain to be explored,  
486 which the methods described here should facilitate.

487           Upper respiratory tract infection is generally accepted to progress to lower respiratory tract  
488 disease in the subset of patients who become seriously ill from respiratory viruses (Florin et al., 2017).  
489 Furthermore respiratory antiviral efficacy is crucially dependent on early treatment (Fry et al., 2014;  
490 Muthuri et al., 2014; Waghmare et al., 2019). Due to the diversity of viral families that cause respiratory  
491 viral disease, utility of previous antiviral compounds (e.g. Oseltamivir) requires rapid identity of the  
492 causative virus, as efficacy is limited to a particular viral family. Typically, by that time, infection has  
493 largely resolved or has progressed to the lower respiratory tract in the case of severe disease and with its  
494 variable attendant complications (e.g. cytokine storm). However, a non-toxic compound active against all  
495 of the major respiratory viral families—be they RNA or DNA viruses, enveloped or not—would make it  
496 possible to initiate treatment early, at the onset of upper respiratory tract viral symptoms, in order to

497 prevent progression to the lower respiratory tract, and thereby achieve optimal benefit in shortening the  
498 duration and severity of illness. Thus, the compounds presented here may have transformative  
499 implications for the treatment of respiratory viral disease, applicable to everything from seasonal FLUV,  
500 common “winter viruses” (RSV, HRV, etc.), to SARS-CoV-2, and other emerging viruses, as well as the  
501 common cold. This could be of particular importance for people at risk, whether because of age,  
502 comorbidities, immunosuppression, or airway hyper-reactivity (e.g. asthma/COPD), and for periods of  
503 widespread infection by highly pathogenic viruses.

504

## 505 **References**

- 506 Akuta, T., Maruyama, T., Sakuma, C., Nakagawa, M., Tomioka, Y., Entzminger, K., Fleming, J.K., Sato,  
507 R., Shibata, T., Kurosawa, Y., Okumura, C.J., Arakawa, T., 2022. A New Method to Characterize  
508 Conformation-Specific Antibody by a Combination of Agarose Native Gel Electrophoresis and  
509 Contact Blotting. *Antibodies Basel Switz.* 11, 36. <https://doi.org/10.3390/antib11020036>
- 510 Alpert, E., Akhavan, A., Gruzman, A., Hansen, W.J., Lehrer-Graiwer, J., Hall, S.C., Johansen, E.,  
511 McAllister, S., Gulati, M., Lin, M.-F., Lingappa, V.R., 2021. Multifunctionality of Prostatic Acid  
512 Phosphatase in Prostate Cancer Pathogenesis. *Biosci. Rep.* BSR20211646.  
513 <https://doi.org/10.1042/BCJ20200944>
- 514 Andrei, S.A., Sijbesma, E., Hann, M., Davis, J., O’Mahony, G., Perry, M.W.D., Karawajczyk, A.,  
515 Eickhoff, J., Brunsveld, L., Doveston, R.G., Milroy, L.-G., Ottmann, C., 2017. Stabilization of  
516 protein-protein interactions in drug discovery. *Expert Opin. Drug Discov.* 12, 925–940.  
517 <https://doi.org/10.1080/17460441.2017.1346608>
- 518 Aslam, B., Basit, M., Nisar, M.A., Khurshid, M., Rasool, M.H., 2017. Proteomics: Technologies and  
519 Their Applications. *J. Chromatogr. Sci.* 55, 182–196. <https://doi.org/10.1093/chromsci/bmw167>
- 520 Bem, R.A., Domachowske, J.B., Rosenberg, H.F., 2011. Animal models of human respiratory syncytial  
521 virus disease. *Am. J. Physiol. Lung Cell. Mol. Physiol.* 301, L148-156.  
522 <https://doi.org/10.1152/ajplung.00065.2011>
- 523 Bhutta, M.S., Gallo, E.S., Borenstein, R., 2021. Multifaceted Role of AMPK in Viral Infections. *Cells* 10,  
524 1118. <https://doi.org/10.3390/cells10051118>
- 525 Blobel, G., 2000. Protein targeting (Nobel lecture). *Chembiochem Eur. J. Chem. Biol.* 1, 86–102.  
526 [https://doi.org/10.1002/1439-7633\(20000818\)1:2<86::AID-CBIC86>3.0.CO;2-A](https://doi.org/10.1002/1439-7633(20000818)1:2<86::AID-CBIC86>3.0.CO;2-A)
- 527 Blueprint for R&D preparedness and response to public health emergencies due to highly infectious  
528 pathogens [WWW Document], 2015.
- 529 Breder, C.D., Du, W., Tyndall, A., 2017. What’s the Regulatory Value of a Target Product Profile?  
530 *Trends Biotechnol.* 35, 576–579. <https://doi.org/10.1016/j.tibtech.2017.02.011>
- 531 Broce, S., Hensley, L., Sato, T., Lehrer-Graiwer, J., Essrich, C., Edwards, K.J., Pajda, J., Davis, C.J.,  
532 Bhadresh, R., Hurt, C.R., Freeman, B., Lingappa, V.R., Kelleher, C.A., Karpuj, M.V., 2016.  
533 Biochemical and biophysical characterization of cell-free synthesized Rift Valley fever virus  
534 nucleoprotein capsids enables in vitro screening to identify novel antivirals. *Biol. Direct* 11, 25.  
535 <https://doi.org/10.1186/s13062-016-0126-5>
- 536 Copeland, K., Hansen, W., Asundi, V., Hong, S., Chamberlin, J., Dey, D., Broce, S., Himmel, H.,  
537 Decloutte, C., Ram, S., Steffen, I., Pöhlmann, S., Lingappa, J.R., Hurt, C.R., Lingappa, V.R.,

- 538 2010. Protein–Protein Interactions Occurring During HIV Capsid Assembly in a Cell-free Protein  
539 Synthesizing System. *Antiviral Res.* 86, A22. <https://doi.org/10.1016/j.antiviral.2010.02.339>
- 540 Copley, S.D., 2012. Moonlighting is mainstream: paradigm adjustment required. *BioEssays News Rev.*  
541 *Mol. Cell. Dev. Biol.* 34, 578–588. <https://doi.org/10.1002/bies.201100191>
- 542 Deretic, V., 2021. Autophagy in inflammation, infection, and immunometabolism. *Immunity* 54, 437–  
543 453. <https://doi.org/10.1016/j.immuni.2021.01.018>
- 544 European Food Safety Authority, European Centre for Disease Prevention, Control, European Union  
545 Reference Laboratory for Avian Influenza, Adlhoch, C., Fusaro, A., Gonzales, J.L., Kuiken, T.,  
546 Marangon, S., Niqueux, É., Staubach, C., Terregino, C., Aznar, I., Muñoz Guajardo, I., Baldinelli,  
547 F., 2021. Avian influenza overview September - December 2021. *EFSA J. Eur. Food Saf. Auth.*  
548 19, e07108. <https://doi.org/10.2903/j.efsa.2021.7108>
- 549 Fenton, A.W., 2008. Allosterity: an illustrated definition for the ‘second secret of life.’ *Trends Biochem.*  
550 *Sci.* 33, 420–425. <https://doi.org/10.1016/j.tibs.2008.05.009>
- 551 Florin, T.A., Plint, A.C., Zorc, J.J., 2017. Viral bronchiolitis. *Lancet Lond. Engl.* 389, 211–224.  
552 [https://doi.org/10.1016/S0140-6736\(16\)30951-5](https://doi.org/10.1016/S0140-6736(16)30951-5)
- 553 Fry, A.M., Goswami, D., Nahar, K., Sharmin, A.T., Rahman, M., Gubareva, L., Azim, T., Bresee, J.,  
554 Luby, S.P., Brooks, W.A., 2014. Efficacy of oseltamivir treatment started within 5 days of  
555 symptom onset to reduce influenza illness duration and virus shedding in an urban setting in  
556 Bangladesh: a randomised placebo-controlled trial. *Lancet Infect. Dis.* 14, 109–118.  
557 [https://doi.org/10.1016/S1473-3099\(13\)70267-6](https://doi.org/10.1016/S1473-3099(13)70267-6)
- 558 Fulcher, M.L., Randell, S.H., 2013. Human nasal and tracheo-bronchial respiratory epithelial cell culture.  
559 *Methods Mol. Biol. Clifton NJ* 945, 109–121. [https://doi.org/10.1007/978-1-62703-125-7\\_8](https://doi.org/10.1007/978-1-62703-125-7_8)
- 560 Gao, Y.-D., Ding, M., Dong, X., Zhang, J.-J., Kursat Azkur, A., Azkur, D., Gan, H., Sun, Y.-L., Fu, W.,  
561 Li, W., Liang, H.-L., Cao, Y.-Y., Yan, Q., Cao, C., Gao, H.-Y., Brüggem, M.-C., van de Veen,  
562 W., Sokolowska, M., Akdis, M., Akdis, C.A., 2021. Risk factors for severe and critically ill  
563 COVID-19 patients: A review. *Allergy* 76, 428–455. <https://doi.org/10.1111/all.14657>
- 564 Goodacre, N., Devkota, P., Bae, E., Wuchty, S., Uetz, P., 2020. Protein-protein interactions of human  
565 viruses. *Semin. Cell Dev. Biol.* 99, 31–39. <https://doi.org/10.1016/j.semdb.2018.07.018>
- 566 Goodwin, C.M., Xu, S., Munger, J., 2015. Stealing the Keys to the Kitchen: Viral Manipulation of the  
567 Host Cell Metabolic Network. *Trends Microbiol.* 23, 789–798.  
568 <https://doi.org/10.1016/j.tim.2015.08.007>
- 569 Gordon, D.E., Hiatt, J., Bouhaddou, M., Rezelj, V.V., Ulferts, S., Braberg, H., Jureka, A.S., Obernier, K.,  
570 Guo, J.Z., Batra, J., Kaake, R.M., Weckstein, A.R., Owens, T.W., Gupta, M., Pourmal, S., Titus,  
571 E.W., Cakir, M., Soucheray, M., McGregor, M., Cakir, Z., Jang, G., O’Meara, M.J., Tummino,  
572 T.A., Zhang, Z., Foussard, H., Rojc, A., Zhou, Y., Kuchenov, D., Hüttenhain, R., Xu, J.,  
573 Eckhardt, M., Swaney, D.L., Fabius, J.M., Ummadi, M., Tutuncuoglu, B., Rathore, U., Modak,  
574 M., Haas, P., Haas, K.M., Naing, Z.Z.C., Pulido, E.H., Shi, Y., Barrio-Hernandez, I., Memon, D.,  
575 Petsalaki, E., Dunham, A., Marrero, M.C., Burke, D., Koh, C., Vallet, T., Silvas, J.A., Azumaya,  
576 C.M., Billesbølle, C., Brilot, A.F., Campbell, M.G., Diallo, A., Dickinson, M.S., Diwanji, D.,  
577 Herrera, N., Hoppe, N., Kratochvil, H.T., Liu, Y., Merz, G.E., Moritz, M., Nguyen, H.C.,  
578 Nowotny, C., Puchades, C., Rizo, A.N., Schulze-Gahmen, U., Smith, A.M., Sun, M., Young, I.D.,  
579 Zhao, J., Asarnow, D., Biel, J., Bowen, A., Braxton, J.R., Chen, J., Chio, C.M., Chio, U.S.,  
580 Deshpande, I., Doan, L., Faust, B., Flores, S., Jin, M., Kim, K., Lam, V.L., Li, F., Li, J., Li, Y.-L.,  
581 Li, Y., Liu, X., Lo, M., Lopez, K.E., Melo, A.A., Moss, F.R., Nguyen, P., Paulino, J., Pawar, K.I.,  
582 Peters, J.K., Pospiech, T.H., Safari, M., Sangwan, S., Schaefer, K., Thomas, P.V., Thwin, A.C.,  
583 Trenker, R., Tse, E., Tsui, T.K.M., Wang, F., Whitis, N., Yu, Z., Zhang, K., Zhang, Y., Zhou, F.,  
584 Saltzberg, D., QCRG Structural Biology Consortium, Hodder, A.J., Shun-Shion, A.S., Williams,  
585 D.M., White, K.M., Rosales, R., Kehrer, T., Miorin, L., Moreno, E., Patel, A.H., Rihn, S., Khalid,  
586 M.M., Vallejo-Gracia, A., Fozouni, P., Simoneau, C.R., Roth, T.L., Wu, D., Karim, M.A.,  
587 Ghousaini, M., Dunham, I., Berardi, F., Weigang, S., Chazal, M., Park, J., Logue, J., McGrath,  
588 M., Weston, S., Haupt, R., Hastie, C.J., Elliott, M., Brown, F., Burness, K.A., Reid, E., Dorward,

- 589 M., Johnson, C., Wilkinson, S.G., Geyer, A., Giesel, D.M., Baillie, C., Raggett, S., Leech, H.,  
590 Toth, R., Goodman, N., Keough, K.C., Lind, A.L., Zoonomia Consortium, Klesh, R.J., Hemphill,  
591 K.R., Carlson-Stevermer, J., Oki, J., Holden, K., Maures, T., Pollard, K.S., Sali, A., Agard, D.A.,  
592 Cheng, Y., Fraser, J.S., Frost, A., Jura, N., Kortemme, T., Manglik, A., Southworth, D.R., Stroud,  
593 R.M., Alessi, D.R., Davies, P., Frieman, M.B., Ideker, T., Abate, C., Jouvenet, N., Kochs, G.,  
594 Shoichet, B., Ott, M., Palmarini, M., Shokat, K.M., García-Sastre, A., Rassen, J.A., Grosse, R.,  
595 Rosenberg, O.S., Verba, K.A., Basler, C.F., Vignuzzi, M., Peden, A.A., Beltrao, P., Krogan, N.J.,  
596 2020a. Comparative host-coronavirus protein interaction networks reveal pan-viral disease  
597 mechanisms. *Science* 370. <https://doi.org/10.1126/science.abe9403>
- 598 Gordon, D.E., Jang, G.M., Bouhaddou, M., Xu, J., Obernier, K., White, K.M., O’Meara, M.J., Rezelj,  
599 V.V., Guo, J.Z., Swaney, D.L., Tummino, T.A., Hüttenhain, R., Kaake, R.M., Richards, A.L.,  
600 Tutuncuoglu, B., Foussard, H., Batra, J., Haas, K., Modak, M., Kim, M., Haas, P., Polacco, B.J.,  
601 Braberg, H., Fabius, J.M., Eckhardt, M., Soucheray, M., Bennett, M.J., Cakir, M., McGregor,  
602 M.J., Li, Q., Meyer, B., Roesch, F., Vallet, T., Mac Kain, A., Miorin, L., Moreno, E., Naing,  
603 Z.Z.C., Zhou, Y., Peng, S., Shi, Y., Zhang, Z., Shen, W., Kirby, I.T., Melnyk, J.E., Chorba, J.S.,  
604 Lou, K., Dai, S.A., Barrio-Hernandez, I., Memon, D., Hernandez-Armenta, C., Lyu, J., Mathy,  
605 C.J.P., Perica, T., Pilla, K.B., Ganesan, S.J., Saltzberg, D.J., Rakesh, R., Liu, X., Rosenthal, S.B.,  
606 Calviello, L., Venkataramanan, S., Liboy-Lugo, J., Lin, Y., Huang, X.-P., Liu, Y., Wankowicz,  
607 S.A., Bohn, M., Safari, M., Ugur, F.S., Koh, C., Savar, N.S., Tran, Q.D., Shengjuler, D., Fletcher,  
608 S.J., O’Neal, M.C., Cai, Y., Chang, J.C.J., Broadhurst, D.J., Klippsten, S., Sharp, P.P., Wenzell,  
609 N.A., Kuzuoglu-Ozturk, D., Wang, H.-Y., Trenker, R., Young, J.M., Cavero, D.A., Hiatt, J.,  
610 Roth, T.L., Rathore, U., Subramanian, A., Noack, J., Hubert, M., Stroud, R.M., Frankel, A.D.,  
611 Rosenberg, O.S., Verba, K.A., Agard, D.A., Ott, M., Emerman, M., Jura, N., von Zastrow, M.,  
612 Verdin, E., Ashworth, A., Schwartz, O., d’Enfert, C., Mukherjee, S., Jacobson, M., Malik, H.S.,  
613 Fujimori, D.G., Ideker, T., Craik, C.S., Floor, S.N., Fraser, J.S., Gross, J.D., Sali, A., Roth, B.L.,  
614 Ruggero, D., Taunton, J., Kortemme, T., Beltrao, P., Vignuzzi, M., García-Sastre, A., Shokat,  
615 K.M., Shoichet, B.K., Krogan, N.J., 2020b. A SARS-CoV-2 protein interaction map reveals  
616 targets for drug repurposing. *Nature* 583, 459–468. <https://doi.org/10.1038/s41586-020-2286-9>
- 617 Gupta, S., Ylä-Anttila, P., Sandalova, T., Achour, A., Masucci, M.G., 2020. Interaction With 14-3-3  
618 Correlates With Inactivation of the RIG-I Signalingosome by Herpesvirus Ubiquitin Deconjugases.  
619 *Front. Immunol.* 11, 437. <https://doi.org/10.3389/fimmu.2020.00437>
- 620 Harrell, E.K.T., Copeland, K., Prasad, M.D., Asundi, V., Hahner, N., Francis, J., Dey, D., Welsh, J.C.,  
621 Macieik, A., Lingappa, J.R., Kelleher, C., Hurt, C.R., Hansen, W.J., 2010. Cell-Free Protein  
622 Synthesizing Systems As Tools for Discovery of Drugs Inhibiting Viral Capsid Assembly.  
623 *Antiviral Res.* 86, pA61.
- 624 Ingber, D.E., 2020. Is it Time for Reviewer 3 to Request Human Organ Chip Experiments Instead of  
625 Animal Validation Studies? *Adv. Sci. Weinh. Baden-Wurt. Ger.* 7, 2002030.  
626 <https://doi.org/10.1002/advs.202002030>
- 627 Ison, M.G., 2011. Antivirals and resistance: influenza virus. *Curr. Opin. Virol.* 1, 563–573.  
628 <https://doi.org/10.1016/j.coviro.2011.09.002>
- 629 Jeffery, C.J., 2019. Multitalented actors inside and outside the cell: recent discoveries add to the number  
630 of moonlighting proteins. *Biochem. Soc. Trans.* 47, 1941–1948.  
631 <https://doi.org/10.1042/BST20190798>
- 632 Jia, H., Liang, Z., Zhang, X., Wang, J., Xu, W., Qian, H., 2017. 14-3-3 proteins: an important regulator of  
633 autophagy in diseases. *Am. J. Transl. Res.* 9, 4738–4746.
- 634 Jung, K., Saif, L.J., Wang, Q., 2020. Porcine epidemic diarrhea virus (PEDV): An update on etiology,  
635 transmission, pathogenesis, and prevention and control. *Virus Res.* 286, 198045.  
636 <https://doi.org/10.1016/j.virusres.2020.198045>
- 637 Kii, I., Sumida, Y., Goto, T., Sonamoto, R., Okuno, Y., Yoshida, S., Kato-Sumida, T., Koike, Y., Abe,  
638 M., Nonaka, Y., Ikura, T., Ito, N., Shibuya, H., Hosoya, T., Hagiwara, M., 2016. Selective



- 639 inhibition of the kinase DYRK1A by targeting its folding process. *Nat. Commun.* 7, 11391.  
640 <https://doi.org/10.1038/ncomms11391>
- 641 Koonin, E.V., Dolja, V.V., Krupovic, M., 2015. Origins and evolution of viruses of eukaryotes: The  
642 ultimate modularity. *Virology* 479–480, 2–25. <https://doi.org/10.1016/j.virol.2015.02.039>
- 643 Krupovic, M., Koonin, E.V., 2017. Multiple origins of viral capsid proteins from cellular ancestors. *Proc.*  
644 *Natl. Acad. Sci. U. S. A.* 114, E2401–E2410. <https://doi.org/10.1073/pnas.1621061114>
- 645 Leliveld, S.R., Korth, C., 2007. The use of conformation-specific ligands and assays to dissect the  
646 molecular mechanisms of neurodegenerative diseases. *J. Neurosci. Res.* 85, 2285–2297.  
647 <https://doi.org/10.1002/jnr.21353>
- 648 Lingappa, J.R., Hill, R.L., Wong, M.L., Hegde, R.S., 1997. A multistep, ATP-dependent pathway for  
649 assembly of human immunodeficiency virus capsids in a cell-free system. *J. Cell Biol.* 136, 567–  
650 581. <https://doi.org/10.1083/jcb.136.3.567>
- 651 Lingappa, J.R., Lingappa, V.R., Reed, J.C., 2021. Addressing Antiretroviral Drug Resistance with Host-  
652 Targeting Drugs-First Steps towards Developing a Host-Targeting HIV-1 Assembly Inhibitor.  
653 *Viruses* 13, 451. <https://doi.org/10.3390/v13030451>
- 654 Lingappa, J.R., Martin, R.L., Wong, M.L., Ganem, D., Welch, W.J., Lingappa, V.R., 1994. A eukaryotic  
655 cytosolic chaperonin is associated with a high molecular weight intermediate in the assembly of  
656 hepatitis B virus capsid, a multimeric particle. *J. Cell Biol.* 125, 99–111.  
657 <https://doi.org/10.1083/jcb.125.1.99>
- 658 Lingappa, U.F., Wu, X., Maciek, A., Yu, S.F., Atuegbu, A., Corpuz, M., Francis, J., Nichols, C.,  
659 Calayag, A., Shi, H., Ellison, J.A., Harrell, E.K.T., Asundi, V., Lingappa, J.R., Prasad, M.D.,  
660 Lipkin, W.I., Dey, D., Hurt, C.R., Lingappa, V.R., Hansen, W.J., Rupprecht, C.E., 2013. Host-  
661 rabies virus protein-protein interactions as druggable antiviral targets. *Proc. Natl. Acad. Sci.* 110,  
662 E861–E868. <https://doi.org/10.1073/pnas.1210198110>
- 663 Lingappa, V.R., Lingappa, J.R., 2005. Recent insights into biological regulation from cell-free protein-  
664 synthesizing systems. *Mt. Sinai J. Med. N. Y.* 72, 141–160.
- 665 Lingappa, V.R., Rutkowski, D.T., Hegde, R.S., Andersen, O.S., 2002. Conformational control through  
666 translocational regulation: a new view of secretory and membrane protein folding. *BioEssays*  
667 *News Rev. Mol. Cell. Dev. Biol.* 24, 741–748. <https://doi.org/10.1002/bies.10130>
- 668 Liu, J., Cao, S., Ding, G., Wang, B., Li, Y., Zhao, Y., Shao, Q., Feng, J., Liu, S., Qin, L., Xiao, Y., 2021.  
669 The role of 14-3-3 proteins in cell signalling pathways and virus infection. *J. Cell. Mol. Med.* 25,  
670 4173–4182. <https://doi.org/10.1111/jcmm.16490>
- 671 Liu, J., Qian, C., Cao, X., 2016. Post-Translational Modification Control of Innate Immunity. *Immunity*  
672 45, 15–30. <https://doi.org/10.1016/j.immuni.2016.06.020>
- 673 Lo, M.K., Nichol, S.T., Spiropoulou, C.F., 2014. Evaluation of luciferase and GFP-expressing Nipah  
674 viruses for rapid quantitative antiviral screening. *Antiviral Res.* 106, 53–60.  
675 <https://doi.org/10.1016/j.antiviral.2014.03.011>
- 676 Loo, S.-L., Wark, P.A.B., Esneau, C., Nichol, K.S., Hsu, A.C.-Y., Bartlett, N.W., 2020. Human  
677 coronaviruses 229E and OC43 replicate and induce distinct antiviral responses in differentiated  
678 primary human bronchial epithelial cells. *Am. J. Physiol. Lung Cell. Mol. Physiol.* 319, L926–  
679 L931. <https://doi.org/10.1152/ajplung.00374.2020>
- 680 Mao, J., Lin, E., He, L., Yu, J., Tan, P., Zhou, Y., 2019. Autophagy and Viral Infection. *Adv. Exp. Med.*  
681 *Biol.* 1209, 55–78. [https://doi.org/10.1007/978-981-15-0606-2\\_5](https://doi.org/10.1007/978-981-15-0606-2_5)
- 682 McKimm-Breschkin, J.L., 2013. Influenza neuraminidase inhibitors: antiviral action and mechanisms of  
683 resistance. *Influenza Other Respir. Viruses* 7 Suppl 1, 25–36. <https://doi.org/10.1111/irv.12047>
- 684 Michi, A.N., Proud, D., 2021. A toolbox for studying respiratory viral infections using air-liquid interface  
685 cultures of human airway epithelial cells. *Am. J. Physiol. Lung Cell. Mol. Physiol.* 321, L263–  
686 L280. <https://doi.org/10.1152/ajplung.00141.2021>
- 687 Motlagh, H.N., Hilsner, V.J., 2012. Agonism/antagonism switching in allosteric ensembles. *Proc. Natl.*  
688 *Acad. Sci. U. S. A.* 109, 4134–4139. <https://doi.org/10.1073/pnas.1120519109>

- 689 Movia, D., Prina-Mello, A., 2020. Preclinical Development of Orally Inhaled Drugs (OIDs)-Are Animal  
690 Models Predictive or Shall We Move Towards In Vitro Non-Animal Models? *Anim. Open*  
691 *Access J. MDPI* 10, E1259. <https://doi.org/10.3390/ani10081259>
- 692 Muthuri, S.G., Venkatesan, S., Myles, P.R., Leonardi-Bee, J., Al Khuwaitir, T.S.A., Al Mamun, A.,  
693 Anovadiya, A.P., Azziz-Baumgartner, E., Báez, C., Bassetti, M., Beovic, B., Bertisch, B.,  
694 Bonmarin, I., Booy, R., Borja-Aburto, V.H., Burgmann, H., Cao, B., Carratala, J., Denholm, J.T.,  
695 Dominguez, S.R., Duarte, P.A.D., Dubnov-Raz, G., Echavarria, M., Fanella, S., Gao, Z.,  
696 Gérardin, P., Giannella, M., Gubbels, S., Herberg, J., Iglesias, A.L.H., Hoger, P.H., Hu, X., Islam,  
697 Q.T., Jiménez, M.F., Kandeel, A., Keijzers, G., Khalili, H., Knight, M., Kudo, K., Kuszniery, G.,  
698 Kuzman, I., Kwan, A.M.C., Amine, I.L., Langenegger, E., Lankarani, K.B., Leo, Y.-S., Linko,  
699 R., Liu, P., Madanat, F., Mayo-Montero, E., McGeer, A., Memish, Z., Metan, G., Mickiene, A.,  
700 Mikić, D., Mohn, K.G.I., Moradi, A., Nymadawa, P., Oliva, M.E., Ozkan, M., Parekh, D., Paul,  
701 M., Polack, F.P., Rath, B.A., Rodríguez, A.H., Sarrouf, E.B., Seale, A.C., Sertogullarindan, B.,  
702 Siqueira, M.M., Skreř-Magierło, J., Stephan, F., Talarek, E., Tang, J.W., To, K.K.W., Torres, A.,  
703 Törün, S.H., Tran, D., Uyeki, T.M., Van Zwol, A., Vaudry, W., Vidmar, T., Yokota, R.T.C.,  
704 Zarogoulidis, P., PRIDE Consortium Investigators, Nguyen-Van-Tam, J.S., 2014. Effectiveness  
705 of neuraminidase inhibitors in reducing mortality in patients admitted to hospital with influenza A  
706 H1N1pdm09 virus infection: a meta-analysis of individual participant data. *Lancet Respir. Med.*  
707 2, 395–404. [https://doi.org/10.1016/S2213-2600\(14\)70041-4](https://doi.org/10.1016/S2213-2600(14)70041-4)
- 708 Nijhuis, M., van Maarseveen, N.M., Boucher, C.A.B., 2009. Antiviral Resistance and Impact on Viral  
709 Replication Capacity: Evolution of Viruses Under Antiviral Pressure Occurs in Three Phases, in:  
710 Kräusslich, H.-G., Bartenschlager, R. (Eds.), *Antiviral Strategies, Handbook of Experimental*  
711 *Pharmacology*. Springer Berlin Heidelberg, Berlin, Heidelberg, pp. 299–320.  
712 [https://doi.org/10.1007/978-3-540-79086-0\\_11](https://doi.org/10.1007/978-3-540-79086-0_11)
- 713 Nirenberg, M., 2004. Historical review: Deciphering the genetic code – a personal account. *Trends*  
714 *Biochem. Sci.* 29, 46–54. <https://doi.org/10.1016/j.tibs.2003.11.009>
- 715 Obsilova, V., Obsil, T., 2020. The 14-3-3 Proteins as Important Allosteric Regulators of Protein Kinases.  
716 *Int. J. Mol. Sci.* 21, E8824. <https://doi.org/10.3390/ijms21228824>
- 717 Peck, K.M., Luring, A.S., 2018. Complexities of Viral Mutation Rates. *J. Virol.* 92.  
718 <https://doi.org/10.1128/JVI.01031-17>
- 719 Pei, Z., Harrison, M.S., Schmitt, A.P., 2011. Parainfluenza virus 5 m protein interaction with host protein  
720 14-3-3 negatively affects virus particle formation. *J. Virol.* 85, 2050–2059.  
721 <https://doi.org/10.1128/JVI.02111-10>
- 722 Perrin-Cocon, L., Diaz, O., Jacquemin, C., Barthel, V., Ogire, E., Ramière, C., André, P., Lotteau, V.,  
723 Vidalain, P.-O., 2020. The current landscape of coronavirus-host protein-protein interactions. *J.*  
724 *Transl. Med.* 18, 319. <https://doi.org/10.1186/s12967-020-02480-z>
- 725 Petsch, B., Hurt, C.R., Freeman, B., Zirdum, E., Ganesh, A., Schörg, A., Kitaygorodskyy, A., Marwidi,  
726 Y., Ducoudret, O., Kelleher, C., Hansen, W., Lingappa, V.R., Essrich, C., Stitz, L., 2010.  
727 Discovery of Novel Small Molecule Inhibitors of Multiple Influenza Strains in Cell Culture.  
728 *Antiviral Res.* 86, A42. <https://doi.org/10.1016/j.antiviral.2010.02.398>
- 729 Reed, J.C., Solas, D., Kitaygorodskyy, A., Freeman, B., Ressler, D.T.B., Phuong, D.J., Swain, J.V.,  
730 Matlack, K., Hurt, C.R., Lingappa, V.R., Lingappa, J.R., 2021. Identification of an Antiretroviral  
731 Small Molecule That Appears To Be a Host-Targeting Inhibitor of HIV-1 Assembly. *J. Virol.* 95.  
732 <https://doi.org/10.1128/JVI.00883-20>
- 733 Song, L., Luo, Z.-Q., 2019. Post-translational regulation of ubiquitin signaling. *J. Cell Biol.* 218, 1776–  
734 1786. <https://doi.org/10.1083/jcb.201902074>
- 735 Stevers, L.M., Sijbesma, E., Botta, M., MacKintosh, C., Obsil, T., Landrieu, I., Cau, Y., Wilson, A.J.,  
736 Karawajczyk, A., Eickhoff, J., Davis, J., Hann, M., O’Mahony, G., Doveston, R.G., Brunsveld,  
737 L., Ottmann, C., 2018. Modulators of 14-3-3 Protein-Protein Interactions. *J. Med. Chem.* 61,  
738 3755–3778. <https://doi.org/10.1021/acs.jmedchem.7b00574>



- 739 Tanaka, A., 2009. Identification of the specific binding proteins of bioactive small compound using  
740 affinity resins. *Methods Mol. Biol. Clifton NJ* 577, 181–195. [https://doi.org/10.1007/978-1-](https://doi.org/10.1007/978-1-60761-232-2_14)  
741 [60761-232-2\\_14](https://doi.org/10.1007/978-1-60761-232-2_14)
- 742 Tugaeva, K.V., Hawkins, D.E.D.P., Smith, J.L.R., Bayfield, O.W., Ker, D.-S., Sysoev, A.A., Klychnikov,  
743 O.I., Antson, A.A., Sluchanko, N.N., 2021. The Mechanism of SARS-CoV-2 Nucleocapsid  
744 Protein Recognition by the Human 14-3-3 Proteins. *J. Mol. Biol.* 433, 166875.  
745 <https://doi.org/10.1016/j.jmb.2021.166875>
- 746 Umezawa, K., Kii, I., 2021. Druggable Transient Pockets in Protein Kinases. *Mol. Basel Switz.* 26, 651.  
747 <https://doi.org/10.3390/molecules26030651>
- 748 Uversky, V.N., 2016. Dancing Protein Clouds: The Strange Biology and Chaotic Physics of Intrinsically  
749 Disordered Proteins. *J. Biol. Chem.* 291, 6681–6688. <https://doi.org/10.1074/jbc.R115.685859>
- 750 Waghmare, A., Xie, H., Kuypers, J., Sorrow, M.L., Jerome, K.R., Englund, J.A., Boeckh, M., Leisenring,  
751 W.M., 2019. Human Rhinovirus Infections in Hematopoietic Cell Transplant Recipients: Risk  
752 Score for Progression to Lower Respiratory Tract Infection. *Biol. Blood Marrow Transplant.* 25,  
753 1011–1021. <https://doi.org/10.1016/j.bbmt.2018.12.005>
- 754 Watanabe, T., Kawakami, E., Shoemaker, J.E., Lopes, T.J.S., Matsuoka, Y., Tomita, Y., Kozuka-Hata,  
755 H., Gorai, T., Kuwahara, T., Takeda, E., Nagata, A., Takano, R., Kiso, M., Yamashita, M., Sakai-  
756 Tagawa, Y., Katsura, H., Nonaka, N., Fujii, H., Fujii, K., Sugita, Y., Noda, T., Goto, H.,  
757 Fukuyama, S., Watanabe, S., Neumann, G., Oyama, M., Kitano, H., Kawaoka, Y., 2014.  
758 Influenza virus-host interactome screen as a platform for antiviral drug development. *Cell Host*  
759 *Microbe* 16, 795–805. <https://doi.org/10.1016/j.chom.2014.11.002>
- 760 Welch, S.R., Scholte, F.E.M., Harmon, J.R., Coleman-McCray, J.D., Lo, M.K., Montgomery, J.M.,  
761 Nichol, S.T., Spiropoulou, C.F., Spengler, J.R., 2020. In Situ Imaging of Fluorescent Nipah Virus  
762 Respiratory and Neurological Tissue Tropism in the Syrian Hamster Model. *J. Infect. Dis.* 221,  
763 S448–S453. <https://doi.org/10.1093/infdis/jiz393>
- 764 WHO publishes list of top emerging diseases likely to cause major epidemics [WWW Document], 2015. .  
765 [https://www.who.int/news/item/10-12-2015-who-publ.-list--top-emerg.-dis.-likely--cause-major-](https://www.who.int/news/item/10-12-2015-who-publ.-list--top-emerg.-dis.-likely--cause-major-epidemics)  
766 [Epidemics.](https://www.who.int/news/item/10-12-2015-who-publ.-list--top-emerg.-dis.-likely--cause-major-epidemics) URL [https://www.who.int/news/item/10-12-2015-who-publ.-list--top-](https://www.who.int/news/item/10-12-2015-who-publ.-list--top-emerg.-dis.-likely--cause-major-epidemics)  
767 [emerging-diseases-likely-to-cause-major-epidemics](https://www.who.int/news/item/10-12-2015-who-publ.-list--top-emerg.-dis.-likely--cause-major-epidemics)
- 768 Williams, N.K., Dichtl, B., 2018. Co-translational control of protein complex formation: a fundamental  
769 pathway of cellular organization? *Biochem. Soc. Trans.* 46, 197–206.  
770 <https://doi.org/10.1042/BST20170451>
- 771 Xu, Y., Wu, W., Han, Q., Wang, Y., Li, C., Zhang, P., Xu, H., 2019. Post-translational modification  
772 control of RNA-binding protein hnRNPK function. *Open Biol.* 9, 180239.  
773 <https://doi.org/10.1098/rsob.180239>
- 774 Zhao, Z., Lu, K., Mao, B., Liu, S., Trilling, M., Huang, A., Lu, M., Lin, Y., 2021. The interplay between  
775 emerging human coronavirus infections and autophagy. *Emerg. Microbes Infect.* 10, 196–205.  
776 <https://doi.org/10.1080/22221751.2021.1872353>  
777

## 778 **Acknowledgments:**

779  
780 We thank Alfredo Calayag, Lisa Tucker, Caleb Declouette, Yvonne Dickschen, and Björn Wefers for  
781 excellent technical assistance, David Hanzel for careful reading and improvement of the manuscript, and  
782 Dmitry Temnikov for IT support. We are indebted to the late Guenter Blobel for advice, inspiration, and  
783 encouragement.  
784

## 785 **Funding:**

786 Funding for this work was provided by Prosetta Biosciences Inc. A.M.S. and C.K. are funded by a grant  
787 from the Deutsche Forschungsgemeinschaft (KO1679/15-1).  
788

789  
790  
791  
792  
793  
794  
795  
796  
797  
798  
799  
800  
801  
802  
803  
804  
805  
806  
807  
808  
809  
810  
811  
812  
813  
814  
815  
816  
817  
818  
819  
820  
821  
822  
823  
824  
825  
826  
827  
828

**Author contributions:**

Experiments: MM, DL, JC, SFY, AM, VRL, AMS, SB, AFL, EMB, OA, JL, FD, IJ, DG, ARM, IB, SL, IS, MF, ND, CN, JR, JRL, DD, KM, MF, NSP, MF, MJF, KC, MKL.

Reagents and method development: UA, VA, SH, AFL, AMS, KM, MM, SY, KC, LM, PNO, MA, JCR, JRL, OA, HS, IJ, MKL.

Synthetic chemistry: KP, DS, AK.

Analysis and interpretation: UFL, AFL, VRL, EP, CN, TWC, SKA, SS, RAT, RJH, SM, DP, MJF, AMS, CK, BO, JG, SP, MKL, CFS, JMM.

Writing: HB, UFL, CK, AMS, VRL.

**Competing interests:**

VRL is CEO of Prosetta Biosciences.

**Disclaimer Statement:**

The findings and conclusions in this report are those of the authors and do not necessarily represent the views of the Centers for Disease Control and Prevention.

**Data availability:**

All data are included in the main text or supplementary materials.

**Ethics:**

De-identified human airway tissue samples were obtained from an Institutional Review Board approved biobank at UCSF (protocol #13-10738). All animal studies were approved by Institutional Animal Care and Use Committees.

**Supplementary Materials**

Materials and Methods

Figures S1 to S6

Table S1

## 829 **Materials and Methods**

### 830 *Materials*

831 Materials were purchased from Sigma Chemical Co. or Thermo Fisher, unless otherwise noted.

832 Selected antibodies were purchased from Bethyl Laboratories, Inc (rabbit polyclonal affinity purified

833 antibody to VCP/p97, catalog number A300-588A-T), Abcam (mouse monoclonal antibody to p62,

834 catalog number ab56416), Santa Cruz (rabbit polyclonal pan 14-3-3 antibody catalog number SC-1657),

835 LSBio (rabbit polyclonal antibody to CAPN2, catalog number LS-C400613).

836

### 837 *CFPSA screen*

838 Coding regions of interest were engineered behind the SP6 bacteriophage promoter and the

839 *Xenopus* globin 5' UTR63. DNA was amplified by PCR and then transcribed in vitro to generate mRNA

840 encoding each full-length protein. Translations were carried out in wheat germ extracts supplemented

841 with energy and amino acids, as previously described(7). Moderate-throughput small molecule screening

842 was carried out in 384-well plate format by translation of eGFP and FLUV NP and M mRNA in the

843 presence of small molecules from the Prosetta compound collection (Figure S2). Reactions were run at

844 26°C for 1-2 hours for synthesis, followed by assembly at 34°C for 2 hours. eGFP fluorescent readout

845 was measured at 488/515 nm (excitation/emission) to assess protein synthesis. Assembly products were

846 captured on a second 384-well plate precoated with affinity-purified FLUV NP antibody. Plates were

847 washed with PBS containing 1% Triton X-100, decorated with biotinylated affinity-purified FLUV NP

848 antibody, washed, detected by NeutraAvidin HRP, washed again, and then incubated with a fluorogenic

849 HRP substrate Quanta Blue for 1 hour. FLUV assembly fluorescent readout was measured at 330/425 nm

850 (excitation/emission).

851

### 852 *FLUV assay in MDCK cells*

853 MDCK.2 cells were seeded at  $3 \times 10^4$  cells/well in Eagle's minimal essential medium (MEM)

854 supplemented with fetal bovine serum (FBS) in a 96-well plate and incubated overnight at 37°C. The next

855 day, cells were washed with phosphate buffered saline (PBS) and infected with FLUV A/WSN/33 at an  
856 MOI of 0.01-0.001 for 1 hour, after which the virus containing media was removed and fresh media  
857 containing dilutions of compound or DMSO as a vehicle control was added to the cells. After 24  
858 hours, media was removed, cells were washed with PBS, and fresh media was added for a 2 hour  
859 incubation and then collected for TCID<sub>50</sub> determination. Seven replicates of 10-fold serial dilutions of  
860 collected media were added to new cells and incubated at 37°C for 3 days. The number of infected wells  
861 for each dilution was determined by visual inspection, and TCID<sub>50</sub>/mL was calculated using the Reed and  
862 Muench method(37). Infection experiments were conducted in a BSL2 laboratory.

863

#### 864 *BoCoV assay in HRT-18G cells*

865 HRT-18G cells were seeded at  $3 \times 10^4$  cells/well in Dulbecco's modified Eagle medium (DMEM)  
866 in a 96-well plate and incubated overnight at 37°C. The next day, cells were infected with BoCoV BRCV-  
867 OK-0514-2 (ATCC VR-2460) at an MOI of 1 for 2 hours, after which the virus containing media was  
868 removed, cells were washed with PBS, and fresh media containing dilutions of compound or DMSO  
869 as a vehicle control was added to the cells. After 42-48 hours, media was removed, cells were washed  
870 with PBS, and fresh media was added for a 4 hour incubation and then collected for TCID<sub>50</sub>  
871 determination. Infection experiments were conducted in a BSL2 laboratory.

872

#### 873 *HRV assay in H1-HeLa cells*

874 H1-HeLa cells were seeded at  $7 \times 10^4$  cells/well in MEM in a 96-well plate and incubated  
875 overnight at 37°C. The next day, cells were infected with HRV-16 at an MOI of 5 for 1.5 hours, after  
876 which the virus containing media was removed, cells were washed with PBS, and fresh media  
877 containing dilutions of compound or DMSO as a vehicle control was added to the cells. After 72  
878 hours, media was collected for TCID<sub>50</sub> determination. Infection experiments were conducted in a BSL2  
879 laboratory.

880

881 *MHV assay in BHK-21 cells*

882 BHK-21 cells were seeded at  $2.5 \times 10^5$  cells/well in MEM in a 96-well plate and incubated  
883 overnight at 37°C. The next day, cells were infected with MHV-68 at an MOI of 0.5 for 1.5-2 hours, after  
884 which the virus containing media was removed, cells were washed with PBS, and fresh media  
885 containing dilutions of compound or DMSO as a vehicle control was added to the cells. After 24  
886 hours, media was removed, cells were washed with PBS, and fresh media was added for a 4 hour  
887 incubation and then collected for TCID<sub>50</sub> determination. Infection experiments were conducted in a  
888 BSL2 laboratory.

889

890 *SARS-CoV-2 assay in Vero cells*

891 Vero clone E6 (CRL-1586) cells were plated at  $3 \times 10^5$  cells/well in DMEM in 6-well plates and  
892 incubated overnight at 37°C. The next day, cells were washed once with PBS and then infected with  
893 SARS-CoV-2 WA1/2020 (MN985325.1, BEI resources) at a MOI of 0.01 for 1 hour after which the  
894 virus containing media was removed and the compounds were added to the cells and incubated for  
895 72 hours at 37°C at 5% CO<sub>2</sub>. The cells were then fixed and stained with crystal violet to determine  
896 plaque numbers(38). Infection experiments were conducted in a BSL3 laboratory. Data shown in  
897 Figure 4B are the averages of two biological replicates; error bars indicate standard error; DMSO is  
898 included as the vehicle control.

899

900 *SARS-CoV-2 (delta) assay in Calu-3 cells*

901 Calu-3 cells were seeded at a density of  $3 \times 10^4$  cells/well in DMEM in 96-well plates and  
902 incubated overnight at 37°C. The next day, cells were pre-incubated with compounds for 4 hours before  
903 they were infected with SARS-CoV-2 delta SL102 (EPI\_ISL\_4471559) at a MOI of 0.01-0.05. After 24  
904 hours the viruses within 50 µl of the supernatants were lysed with 200 µL AVL-buffer (Qiagen) and 200  
905 µL 100% ethanol was added for complete inactivation. RNA was extracted from 200 µL of the lysates  
906 using the EZ1 Virus Mini-Kit (Qiagen), and analyzed by qPCR as described(39). Infection experiments

907 were conducted in a BSL3 laboratory. Data shown are the averages of three biological replicates; error  
908 bars indicate standard error; DMSO is included as the vehicle control.

909

#### 910 *Cell culture for Nipah virus studies*

911 Human telomerase reverse-transcriptase immortalized primary-like small airway epithelial cells  
912 (HSAEC1-KT, ATCC CRL-4050) were cultured in Airway Epithelial Basal Medium (ATCC)  
913 supplemented with Bronchial Epithelial Cell Growth Kit (ATCC) as previously described (Lo et al., 2020  
914 AVR). For infections and cell viability assays, HSAEC1-KT cells were cultured with growth medium  
915 either with or without 5 mM of D-glucose solution (Gibco).

916

#### 917 *Recombinant ZsGreen-expressing Nipah virus infection*

918 HSAEC1-KT cells were seeded at 10,000 cells per well the day prior to infection in 96-well black plates  
919 with clear bottoms (Costar 3603). The following day, cells were infected with recombinant Nipah virus  
920 expressing ZsGreen fluorescence protein (rNiV-ZsG) (Lo et al., 2014, 2018, 2020 AVR; Welch et al.,  
921 2020 JID) at multiplicity of infection 0.01 with ~ 100 50% tissue culture infectious dose (TCID<sub>50</sub>). Levels  
922 of rNiV-ZsG replication were measured at 72 hour post-infection based on mean ZsGreen fluorescence  
923 signal intensity (418<sub>ex</sub>/518<sub>em</sub>) using a Biotek HD1 Synergy instrument (Agilent). Fluorescence signal  
924 intensity assayed in DMSO-treated, virus-infected cells were set as 100% ZsGreen fluorescence. Data  
925 points and error bars for all reporter assays indicate the mean value and standard deviation of 4 biological  
926 replicates, and are representative of at least 2 independent experiments in HSAEC1-KT cells.  
927 Concentrations of compound that inhibited 50% of the green fluorescence signal (EC<sub>50</sub>) were calculated  
928 from dose response data fitted to the mean value of experiments performed for each concentration in the  
929 10-point, 3-fold dilution series using a 4-parameter non-linear logistic regression curve with variable  
930 slope using GraphPad Prism 9 (GraphPad Software, La Jolla, CA, USA).

931

932

933 *CellTiterGlo cell viability assay*

934 Cell viability was assayed using CellTiter-Glo 2.0 assay reagent (Promega) according to manufacturer's  
935 recommendations, with luminescence measured at 72 hours post-compound treatment using a Biotek  
936 HD1 Synergy instrument. Luminescence levels (indicative of cellular ATP levels as a surrogate marker of  
937 cell viability) assayed in DMSO-treated, uninfected cells were set as 100% cell viability. Dose response  
938 curves were fitted to the mean value of experiments performed for each concentration in the 10-point, 3-  
939 fold dilution series using a 4-parameter non-linear logistic regression curve with variable slope. All  
940 CellTiter-Glo cell viability assays were conducted in 96-well opaque white plates (Costar 3917).  
941 Concentrations of compound that inhibited 50% of the luminescence signal ( $CC_{50}$ ) were calculated from  
942 dose response data fitted to the mean value of experiments performed for each concentration in the 10-  
943 point, 3-fold dilution series using a 4-parameter non-linear logistic regression curve with variable slope  
944 using GraphPad Prism 9 (GraphPad Software, La Jolla, CA, USA).

945

946 *Alamar Blue HS cell viability assay*

947 Cell viability was assayed using Alamar Blue HS reagent (Thermofisher) according to manufacturer's  
948 recommendations, with fluorescence ( $560_{ex}/590_{em}$ ) measured at 72 hours post-compound treatment after 4  
949 hours of incubation with reagent using a Biotek HD1 Synergy instrument. Fluorescence levels (indicative  
950 of resazurin reduction as a surrogate marker of cell viability) assayed in DMSO-treated, uninfected cells  
951 were set as 100% cell viability. Dose response curves were fitted to the mean value of experiments  
952 performed for each concentration in the 10-point, 3-fold dilution series using a 4-parameter non-linear  
953 logistic regression curve with variable slope. All Alamar Blue assays were conducted in 96-well black  
954 plates with clear bottoms. Concentrations of compound that inhibited 50% of the fluorescence signal  
955 ( $CC_{50}$ ) were calculated from dose response data fitted to the mean value of experiments performed for  
956 each concentration in the 10-point, 3-fold dilution series using a 4-parameter non-linear logistic  
957 regression curve with variable slope using GraphPad Prism 9 (GraphPad Software, La Jolla, CA, USA).

958



959 *PEDV pig study*

960 18 litters comprised of 91 individuals of newborn (2 – 4 days old) crossbred pigs weighing 3 kg  
961 were randomized to control (vehicle) or treatment groups. Animals were infected with  $1 \times 10^5$  PFU of  
962 PEDV administered orally. Vehicle or drug was administered intramuscular at 4 mg/kg immediately after  
963 challenge and again 24 hours post-infection. Compound efficacy was determined by survivability.  
964 Endpoint of study was 6 days post-infection.

965

966 *RSV cotton rat study*

967 Female cotton rats, ~5 weeks of age, were obtained from Envigo (formerly Harlan), ear-tagged  
968 for identification purposes, and allowed to acclimate for > 1 week prior to study start. Animals were  
969 housed individually. Vehicle or drug was administered by an intraperitoneal route twice daily on study  
970 days -1 through day 4. On day 0, animals were infected with  $1 \times 10^5$  PFU of RSV A-2 virus originally  
971 obtained from ATCC (VR-1540), administered in a 50 mL volume by an intranasal route approximately 2  
972 hours after the morning treatment dose. Back titration of the viral stock and diluted inoculum was  
973 performed to confirm the titer of the RSV stock used for infection. All inoculations were performed while  
974 the animals were under the influence of inhalant anesthesia. All animals were euthanized on day 5 and the  
975 lungs were processed for determination of RSV titers by plaque assay.

976

977 *Cell lysate preparation for eDRAC*

978 Cells or tissues were extracted with PB buffer (10 mM Tris pH 7.6, 10 mM NaCl, 0.1 mM  
979 EDTA, and 0.35% Triton X-100), and centrifuged at 10,000 x g for 10 min. The supernatants were  
980 collected and flash frozen for later use.

981

982 *eDRAC*

983 Drug resin was prepared by coupling compound PAV-431 to an Affi-gel resin at a concentration  
984 of 10  $\mu$ M via the pyrazole nitrogen (Figure S6, synthetic chemistry described below), or position 4 of the

985 phenyl group. Control resin was prepared by blocking the Affi-gel matrix without drug. Resins were  
986 equilibrated with column buffer (50 mM HEPES, pH 7.6, 100 mM KAc, 6 mM MgAc, 1 mM EDTA, 4  
987 mM TGA) prior to any DRAC experiments. 30  $\mu$ L of cell extract supplemented with energy (1 mM ATP,  
988 GTP, CTP and UTP with 4 mM creatine phosphate, and in some cases 5  $\mu$ g/ml rabbit creatine kinase) was  
989 applied to resin columns. The columns were clamped and incubated at 22°C for 1 hour for binding, and  
990 flow through was collected. The columns were then washed with 100 bed volumes of column buffer. For  
991 elution of bound complexes, 100  $\mu$ L of column buffer containing free drug at a final concentration of 100  
992  $\mu$ M – 1 mM (approaching its maximum solubility in water) and supplemented with energy was added, the  
993 column was clamped for 1 hour, and serial eluates were collected. Eluates were analyzed by SDS-PAGE  
994 and WB.

995

#### 996 *Western blotting*

997 SDS-PAGE gels were transferred in Towbin buffer to a polyvinylidene fluoride membrane.  
998 Membranes were then blocked in 1% BSA, incubated for 1 hour at room temperature in a 1:1000 dilution  
999 of 100  $\mu$ g/mL affinity-purified primary antibody, washed three times in PBS with 0.1% Tween-20,  
1000 incubated for 1 hour in a 1:5000 dilution of secondary anti-rabbit or anti-mouse antibody coupled to  
1001 alkaline phosphatase, washed further, and incubated in developer solution prepared from 100  $\mu$ L of 7.5  
1002 mg/mL 5-bromo-4-chloro-3-indolyl phosphate dissolved in 60% dimethyl formamide (DMF) in water and  
1003 100  $\mu$ L of 15 mg/mL nitro blue tetrazolium dissolved in 70% DMF in water, adjusted to 50 mL with 0.1  
1004 M Tris (pH 9.5)/0.1 mM magnesium chloride.

1005

#### 1006 *MS-MS analysis*

1007 Samples were processed by SDS-PAGE using a 10% Bis-Tris NuPAGE gel (Invitrogen) with the  
1008 MES buffer system. The mobility region was excised and processed by in-gel digestion with trypsin using  
1009 a ProGest robot (Digilab) with the protocol outlined below. Washed with 25 mM ammonium bicarbonate  
1010 followed by acetonitrile. Reduced with 10 mM dithiothreitol at 60°C followed by alkylation with 50 mM

1011 iodoacetamide at room temperature. Digested with trypsin (Promega) at 37°C for 4 hours. Quenched with  
1012 formic acid, lyophilized, and reconstituted in 0.1% trifluoroacetic acid.

1013 Half of each digested sample was analyzed by nano LC-MS/MS with a Waters M-Class HPLC  
1014 system interfaced to a ThermoFisher Fusion Lumos mass spectrometer. Peptides were loaded on a  
1015 trapping column and eluted over a 75 µm analytical column at 350 nL/min; both columns were packed  
1016 with Luna C18 resin (Phenomenex). The mass spectrometer was operated in data-dependent mode, with  
1017 the Orbitrap operating at 60,000 FWHM and 15,000 FWHM for MS and MS/MS respectively. APD was  
1018 enabled and the instrument was run with a 3 s cycle for MS and MS/MS.

1019 Data were searched using a local copy of Mascot (Matrix Science) with the following parameters:  
1020 Enzyme: Trypsin/P; Database: SwissProt Human plus the custom sequences\* (concatenated forward and  
1021 reverse plus common contaminants); Fixed modification: Carbamidomethyl (C) Variable modifications:  
1022 Oxidation (M), Acetyl (N-term), Pyro-Glu (N-term Q), Deamidation (N/Q) Mass values: Monoisotopic;  
1023 Peptide Mass Tolerance: 10 ppm; Fragment Mass Tolerance: 0.02 Da; Max Missed Cleavages: 2. The  
1024 data was analyzed by label free quantitation (LFQ) methods(40). LFQ intensity values of each condition  
1025 were measured in triplicate and compared against each other to generate log<sub>2</sub> fold change values for each  
1026 protein and each combination of conditions. Proteins that were found significantly enriched by a log<sub>2</sub> fold  
1027 change of > 1 and an adjusted *p*-value (accounting for multiple hypothesis testing) of < 0.05 in the FLUV  
1028 infected eDRAC eluates compared to the uninfected eluates were searched for in a list of high confidence  
1029 FLUV virus-host protein interactions(14) and the VirusMentha database of virus-protein interactions(41).  
1030 Likewise, significantly enriched and depleted proteins found in the BoCoV infected eDRAC eluate were  
1031 searched for in a list of high confidence coronavirus interactors(12) and an aggregated list of coronavirus  
1032 protein interactors shown experimentally(13).

1033

#### 1034 *Photocross-linking and streptavidin precipitation*

1035 eDRAC columns were eluted with 100µM PAV-431 photocross-linker at 22°C. Eluates were  
1036 crosslinked by exposure to UV light for 3 minutes. Crosslinked products were subjected to treatments that

1037 maintained protein-protein associations (native) or which reduced and denatured all proteins (denatured).  
1038 Native conditions were maintained by diluting an aliquot of the product 20x with 1% Triton-X-100  
1039 column buffer. Denaturation was achieved by adjusting an aliquot to 1% SDS and 10mM DTT and  
1040 heating to 100°C/10 minutes prior to 20x dilution with 1% Triton-X-100 column buffer. Streptavidin  
1041 Sepharose beads were added to both native and denatured samples and mixed for 1 hr to capture all  
1042 biotinylated proteins, with and without co-associated proteins in the native and denatured cases  
1043 respectively, then washed 3x with 1% Triton-containing column buffer. Washed beads were resuspended  
1044 in 20µl of SDS loading buffer and analyzed by SDS-PAGE and WB.

1045

1046

#### 1047 *Primary airway epithelial cell culture*

1048 Human bronchus was harvested from 3 explanted lungs. The tissue was submerged and agitated  
1049 for 1 minute in PBS with antibiotics and 5mM dithiothreitol to wash and remove mucus. After 3 washes,  
1050 the tissue was placed in DMEM with 0.1% protease and antibiotics overnight at 4°C. The next day the  
1051 solution was agitated and remaining tissue removed. Cells were centrifuged at 300g/4°C for 5 minutes,  
1052 then resuspended in 0.05% trypsin-EDTA and incubated for 5 minutes at 37°C. The trypsinization  
1053 reaction was neutralized with 10% FBS in DMEM, then cells were filtered through a cell strainer and  
1054 centrifuged at 300g/4°C for 5 minutes. The cell pellet was resuspended in 10% FBS in DMEM and a  
1055 10uL aliquot was stained with trypan-blue and counted on a hemocytometer.  $7.5 \times 10^4$  cells were plated  
1056 onto each 6mm/0.4mm FNC-coated Transwell air-liquid interface (ALI) insert. 10% FBS in DMEM and  
1057 ALI media were added in equal volumes to each basal compartment and cultures were incubated at  
1058 37°C/5% CO<sub>2</sub>. The next day, media was removed and both compartments were washed with PBS and  
1059 antibiotics. ALI media was then added to each basal compartment and changed every 3 days until cells  
1060 were ready for use at day 28.

1061

1062 All studies involving SARS-CoV-2 infection of primary airway epithelial cells were conducted in  
1063 the Vitalant Research Institute BSL3 High-Containment Facility. 6 hours prior to infection, ALI medium  
1064 containing dilutions of drugs (100nM) or DMSO was added to the basal compartment. For infection, ALI  
1065 medium containing drugs was removed, and SARS-CoV-2 diluted in ALI-culture medium containing  
1066 drugs (100nM, MOI=0.1) was added on to the apical chamber of inserts (250  $\mu$ l) and the basal  
1067 compartment (500  $\mu$ l). The cultures were incubated for 2 hours at 37 $\square$ /5% CO<sub>2</sub> to allow for virus entry,  
1068 then washed, and 500  $\mu$ l of fresh ALI medium containing drugs (100 nM) was added to the basal  
1069 compartment. Drugs were maintained in the medium for the duration of the experiment. Cells were  
1070 incubated at 37 $\square$ /5% CO<sub>2</sub> and harvested for analysis at 36 hours post-infection.

1071  
1072 Total RNA was extracted from mock and SARS-CoV-2-infected primary airway epithelial cells  
1073 with or without drug treatment lysed in Trizol (Thermo Fisher Scientific) using the chloroform-  
1074 isopropanol-ethanol method. 500 ng of RNA was reversed transcribed into cDNA in 20 uL reaction  
1075 volume using RevertAid First Strand cDNA Synthesis kit (Thermo Fisher) in accordance to the  
1076 manufacturer's guidelines. RT-PCR was performed for each sample using Taqman<sup>TM</sup> Universal Master  
1077 Mix II, with UNG (Thermo Fisher) on the ViiA7 Real time PCR system. Primers and probes (2019-nCoV  
1078 RUO kit) for detection of the SARS-CoV-2 Nucleocapsid (N) gene were obtained from IDT.

1079  
1080 *Synthesis of PAV-431*

1081 Synthetic schemes are illustrated in Figure S6. To a solution of 2-methoxy-3-trifluoromethoxy-  
1082 benzaldehyde **1** (2.14 g, 9.71 mmol, 1.0 eq) in toluene (20 mL) was added 2,4-dimethoxybenzyl amine **2**  
1083 (1.78 g, 10.68 mmol, 1.1 eq) and the reaction mixture was stirred at room temperature for 24 hours.  
1084 Toluene was removed to give a residue, which was taken in MeOH (20 mL) and then NaBH<sub>4</sub> (735 mg,  
1085 19.42 mmol, 2.0 eq) was added slowly. The reaction mixture was stirred at room temperature for 6 hours.  
1086 The solvent was removed and the residue was extracted in ethyl acetate and stirred with saturated aq  
1087 NaHCO<sub>3</sub> for 1 hour. The organic layer was collected, dried, and the solvent was removed to give the

1088 crude amine **3**, which was used in the next step without further purification. To a solution of the crude  
1089 amine **3** (4.86 mmol, 1.0 eq) in DMF (20 mL) were added the acid **4** (888 mg, 5.35 mmol, 1.1 eq), DIEA  
1090 (3.13 g, 24.3 mmol, 5eq) and HBTU (2.22 g, 5.83 mmol, 1.2 eq) and the reaction mixture was stirred at  
1091 room temperature for 12 hours. The reaction mixture was then diluted with ethyl acetate (75 mL) and  
1092 washed with 10% aq HCl (1 x 50 mL), sat NaHCO<sub>3</sub> (1 x 50 mL) and water (4 x 50 mL). The organic  
1093 layer was collected, dried (MgSO<sub>4</sub>) and evaporated to give a crude product, which was purified by  
1094 column chromatography (EtOAc:Hexane 25%:75%) to give the amide **5**, which was directly used in the  
1095 next step. The amide **5** was treated with 95% TFA:H<sub>2</sub>O for 12 hours. TFA was removed and azeotroped  
1096 with toluene to give a residue, which was purified by column chromatography (EtOAc:Hexane 10%:50%)  
1097 to give PAV-431 (985 mg, > 95% purity).

1098

#### 1099 *Synthesis of PAV-431 resin*

1100 To a solution of amine **3** (5.85 g, 15.77 mmol, 1.0 eq) in DMF (30 mL) were added the acid **6**  
1101 (2.38 g, 15.77 mmol, 1.0 eq), DIEA (10.2 g, 78.85 mmol, 5eq) and HBTU (7.17 g, 18.92 mmol, 1.2 eq)  
1102 and the reaction mixture was stirred at room temperature for 12 hours. The reaction mixture was then  
1103 diluted with ethyl acetate (75 mL) and washed with 10% aq HCl (1 x 50 mL), sat NaHCO<sub>3</sub> (1 x 50 mL)  
1104 and water (4 x 50 mL). The organic layer was collected, dried (MgSO<sub>4</sub>) and evaporated to give a crude  
1105 product, which was purified by column chromatography (EtOAc/Hexane) to give compound **7**. To a  
1106 stirred solution compound **7** (0.8 g, 1.77 mmol, 1.0 eq) and cesium carbonate (1.15 g, 3.54 mmol, 2.0 eq)  
1107 in DMF (10 mL) was added chloride **8** (0.55 g, 2.66 mmol, 1.5 eq) and the reaction mixture was stirred at  
1108 room temperature for 24 hours. The reaction mixture was diluted with ethyl acetate and washed with  
1109 water (4x) and aq NaCl solution. The organic layer was collected, dried (MgSO<sub>4</sub>) and evaporated to give  
1110 a crude product, which was purified by column chromatography (EtOAc/Hexane) to give compound **9**.  
1111 The amide **9** (1.0 g, 1.6 mmol) was taken in 95% TFA: H<sub>2</sub>O and the reaction mixture was for 12 hours.  
1112 TFA was removed and azeotroped with toluene to give a residue. The residue was taken in DCM and sat.  
1113 NaHCO<sub>3</sub> solution added and stirred for 30 min. The aqueous layer was washed with DCM (2x) and the

1114 combined organic layer, dried ( $\text{MgSO}_4$ ) and evaporated to give a crude amine, which was used in the next  
1115 step without purification. To a solution of the crude amine (1.6 mmol, 1.0 eq) and DIEA (412.8 mg, 3.2  
1116 mmol, 2.0 eq) in DCM (20 mL), was added boc anhydride (523.2 mg, 2.4 mmol, 1.5 eq) and the reaction  
1117 mixture was stirred at room temperature for 8 hours. The solvent was removed and the residue was  
1118 purified by column chromatography (EtOAc/Hexane) to give compound **10**. Compound **10** (100 mg, 0.19  
1119 mmol) was in 5 mL of DCM and then 4 M HCl in dioxane (3 mL, 12 mmol) was added and the reaction  
1120 mixture was stirred for 12 hours. Solvents were removed to give compound **11** as a HCl salt, which was  
1121 used in the next step without further purification. To a solution of Affi-Gel 10 (Bio-Rad, 2 ml, 0.03 mmol,  
1122 1.0 eq) in a solid phase synthesis tube with frit was added a solution of compound **11** (27.7 mg, 0.06  
1123 mmol, 2.0 eq) and DIEA (1.0 mL) in isopropyl alcohol (4 mL) and the tube was put in a shaker for 12  
1124 hours. Excess reagents were drained and the resin was washed with isopropyl alcohol (3x) and then saved  
1125 in isopropyl alcohol.

1126

#### 1127 *Synthesis of PAV-431 photocross-linker*

1128 To 6-(tert-Butoxycarbonylamino)-2-(9H-fluoren-9-ylmethoxycarbonylamino)hexanoic acid **12**  
1129 [468mg (1mmol)] in a 40ml screw top vial was added 4N HCl in Dioxane (3ml). The vial was sealed and  
1130 gently agitated for 20 minutes at room temperature. The mix was then rotary evaporated to dryness and  
1131 the residue placed under high vacuum overnight. The dried residue was taken up into 4ml of DMF  
1132 (anhydrous) and then sequentially treated with 3-(3-Methyldiazirin-3-yl)propanoic acid [128mg  
1133 (1mmol)](42), and DIEA [695ul (4mmol)]. With rapid stirring, under Argon atmosphere, was added  
1134 dropwise HATU [380mg (1mmol)] dissolved in 1ml of DMF. After stirring for 30 minutes the mixture  
1135 was quenched with 10ml of sat.  $\text{NH}_4\text{Cl}$  solution and then extracted 2 x with 10ml of EtOAc. The  
1136 combined organic extracts were washed once with sat. NaCl, dried ( $\text{Mg}_2\text{SO}_4$ ) and then rotary evaporated  
1137 to dryness. The residue was purified by flash chromatography, using a gradient of Ethyl acetate and  
1138 Hexane, affording 2-(9H-fluoren-9-ylmethoxycarbonylamino)-6-[3-(3-methyldiazirin-3-  
1139 yl)propanoylamino]hexanoic acid **13** (293mg) in 61% yield.



1140 To tert-Butyl N-[3-[3-cyclopropyl-5-[[2-methoxy-3-  
1141 (trifluoromethoxy)phenyl]methylcarbamoyl]pyrazol-1-yl]propyl]-N-methyl-carbamate **14** [16mg (0.03  
1142 mmol)] in a 40ml screw top vial was added 4N HCl in Dioxane (0.5ml). The vial was sealed and gently  
1143 agitated for 20min at room temperature. The mix was then rotary evaporated to dryness and the residue  
1144 placed on high vacuum overnight. The dried residue was taken up into 1ml of DMF (anhydrous) and then  
1145 sequentially treated with compound **13** [14.5mg (0.03mmol)], and DIEA [32ul (0.18mmol)]. With rapid  
1146 stirring, under Argon atmosphere, was added dropwise HATU [14.6mg (0.038mmol)] dissolved in 300ul  
1147 of DMF. After stirring for 30 min the mixture was quenched with 5ml of sat. NH<sub>4</sub>Cl solution and then  
1148 extracted 2 x with 5ml of EtOAc.

1149 The combined organic extracts were washed once with sat. NaCl, dried (Mg<sub>2</sub>SO<sub>4</sub>) and then rotary  
1150 evaporated to dryness. The residue was purified by flash chromatography, using a gradient of Ethyl  
1151 acetate and Hexane, affording 9H-fluoren-9-ylmethyl N-[1-[3-[3-cyclopropyl-5-[[2-methoxy-3-  
1152 (trifluoromethoxy)phenyl]methylcarbamoyl]pyrazol-1-yl]propyl-methyl-carbamoyl]-5-[3-(3-  
1153 methyldiazirin-3-yl)propanoylamino]pentyl]carbamate **15** (28mg) in quantitative yield.

1154 To compound **15** [28mg (0.03 mmol)] in a 40ml screw top vial was added 50/50 Diethylamine /  
1155 DMF (0.5ml). The vial was sealed and gently agitated for 60min at room temperature. The mix was then  
1156 rotary evaporated to dryness and the residue placed on high vacuum overnight. The residue was triturated  
1157 2 x with 3ml of Hexane to remove the Dibenzofulvene amine adduct. The residue was again briefly  
1158 placed on high vacuum to remove traces of Hexane. The dried residue was taken up into 1ml of DMF  
1159 (anhydrous) and then treated with Biotin-PEG2-NHS [15mg (0.03mmol)] (purchased from ChemPep),  
1160 and DIEA [16ul (0.09mmol)] and then purged with Argon. After stirring overnight at room temperature,  
1161 the mixture was rotary evaporated to dryness. The residue was purified by reverse phase prep  
1162 chromatography, using a gradient of 0.1% TFA water and Acetonitrile, affording 5-cyclopropyl-N-[[2-  
1163 methoxy-3-(trifluoromethoxy)phenyl]methyl]-2-[3-[methyl-[6-[3-(3-methyldiazirin-3-  
1164 yl)propanoylamino]-2-[3-[2-[2-[5-(2-oxo-1,3,3a,4,6,6a-hexahydrothieno[3,4-d]imidazol-4-

1165 yl)pentanoylamino]ethoxy]ethoxy]propanoylamino]hexanoyl]amino]propyl]pyrazole-3-carboxamide

1166 (26mg) in 80% yield. All compounds were confirmed by LCMS.

1167

1168 **Supplementary Figures and Legends**

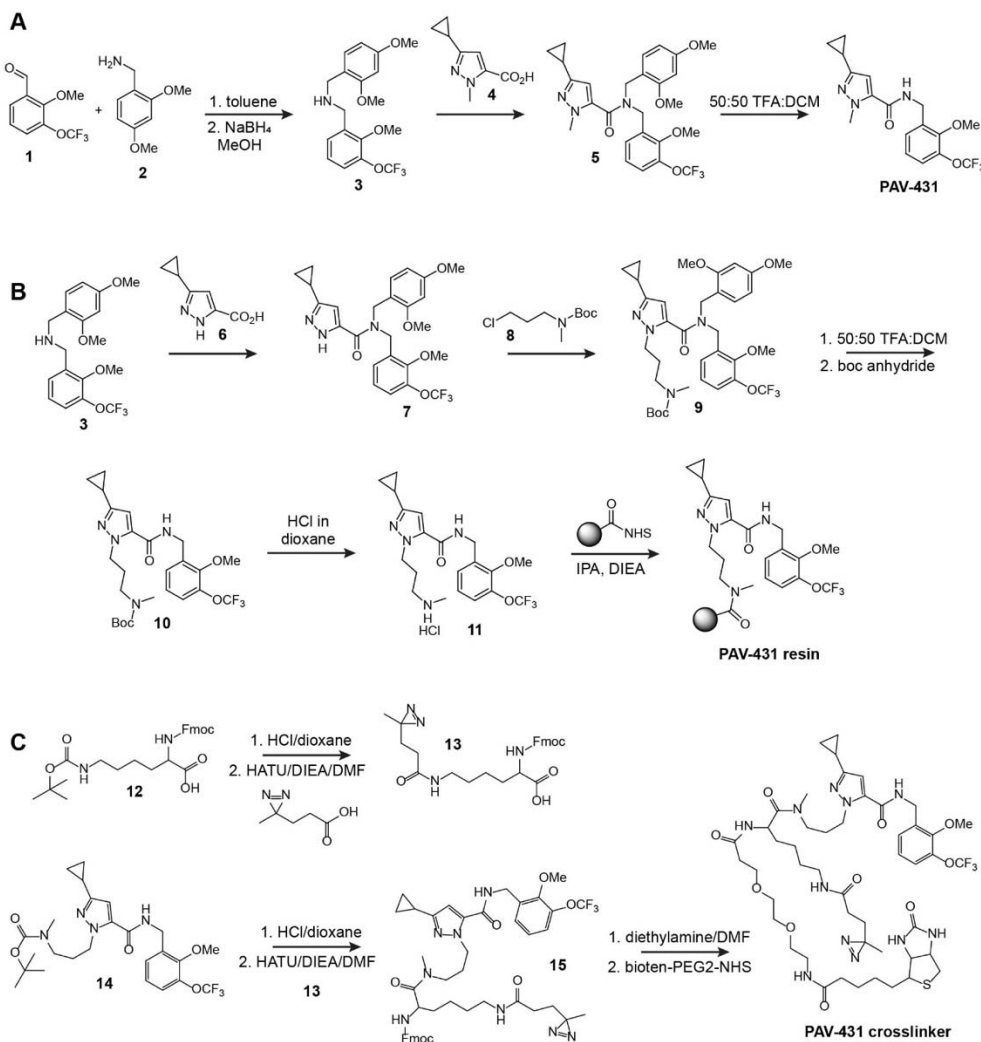

1169

1170

1171 **Supplementary Figure S1.** General scheme for the synthesis of pyrazole carboxamides. (A) Preparation

1172 of PAV-431. (B) Preparation of PAV-431 resin. (C) Preparation of PAV-431 photocross-linker.

1173 Methodological details for these syntheses are described in Materials and Methods.

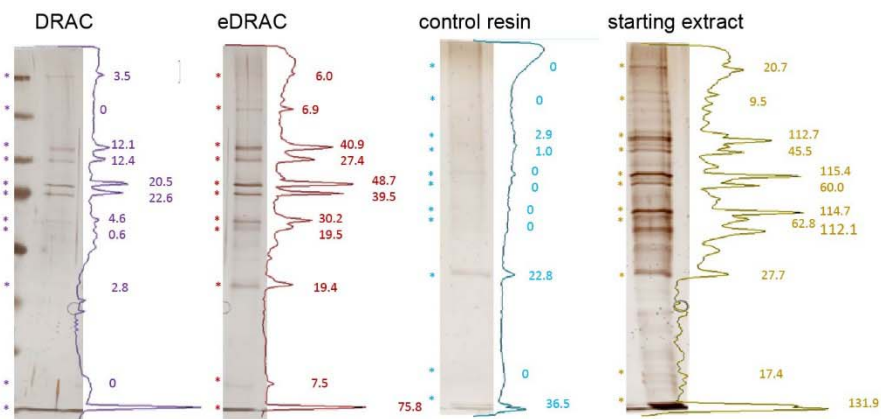

1174  
1175  
1176  
1177  
1178  
1179  
1180  
1181

**Supplementary Figure S2.** eDRAC (DRAC supplemented with metabolic energy) shows a significant increase in target yield, demonstrated by eluates from extracts of MDCK cells analyzed by SDS-PAGE and silver stain showing the full target complex banding pattern. Lane profile traces and peak numbers indicate peak band densities, stars indicate bands present in eDRAC eluate.

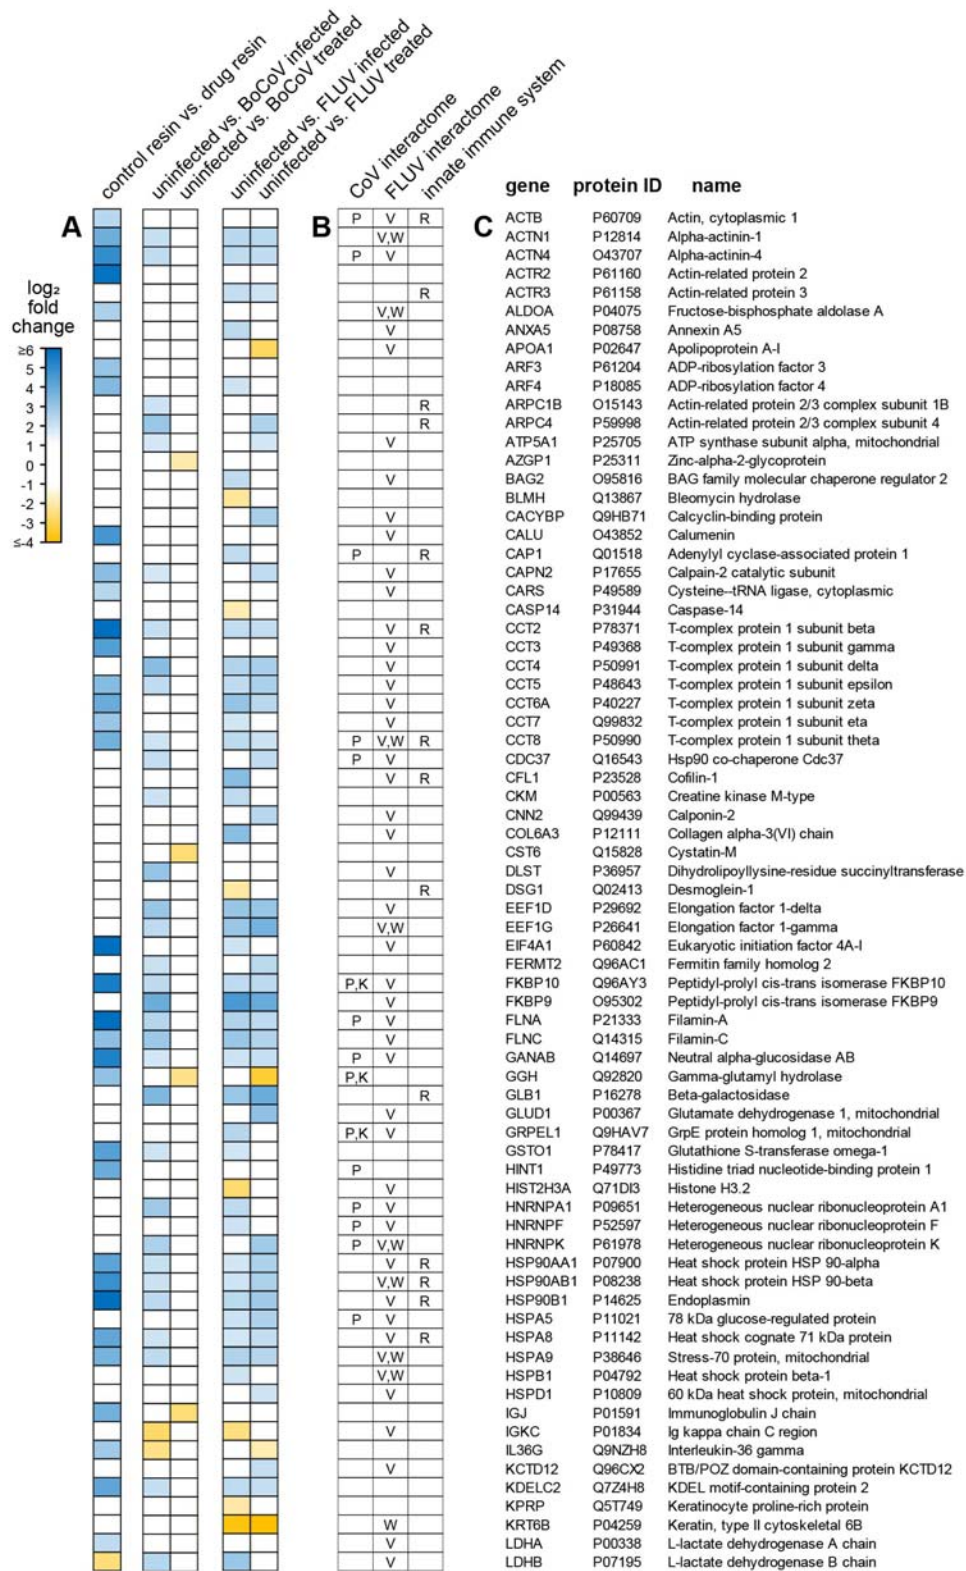

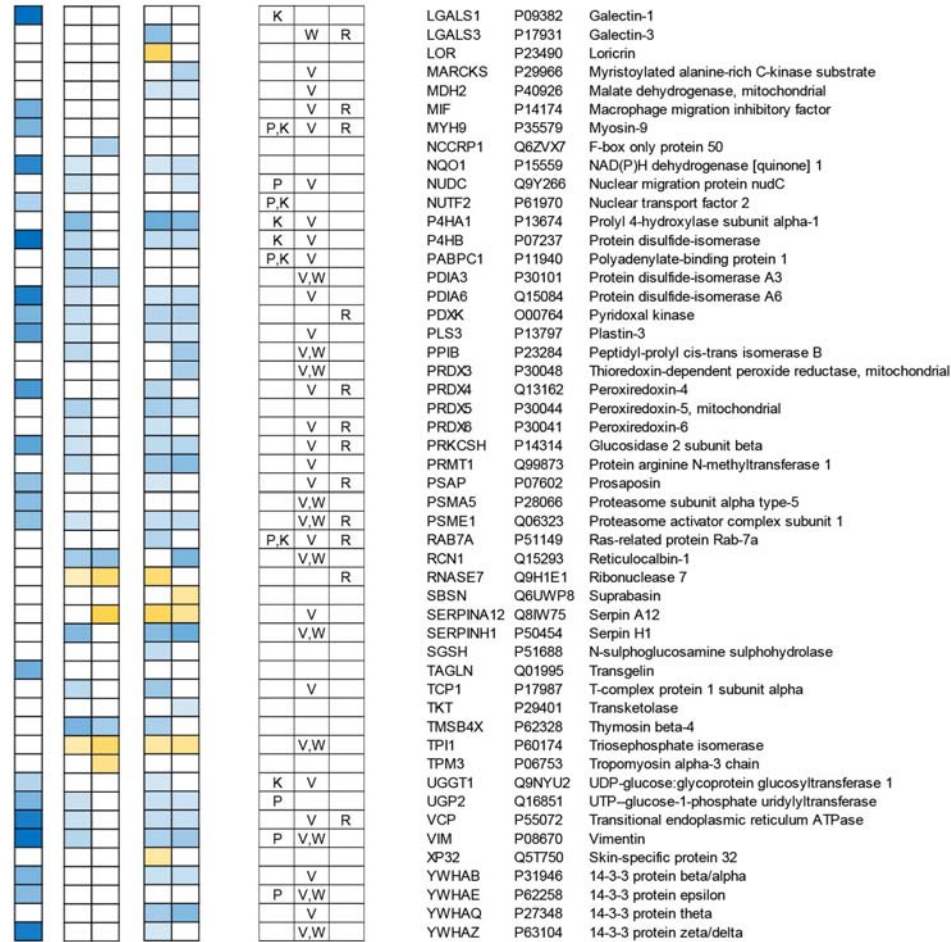

1183

1184

1185 **Supplementary Figure S3.** Proteins corresponding to colored points in Figure 2 volcano plots ( $|\log_2$  fold  
 1186 change $| > 1$  and  $p$ -value  $< 0.05$ ), determined from MS-MS data analyzed by label free quantification with  
 1187 MaxQuant and LFQ-Analyst. (A) Fold change values illustrating the proteins that changed between  
 1188 compared conditions. (B) Known involvement in the CoV, FLUV, and innate immune system  
 1189 interactomes, with sources indicated. P, Perin-Cocon; K, Krogan; V, VirusMentha; W, Watanabe; R,  
 1190 Reactome. (C) Gene and protein identifiers.

1191

1192

1193

1194

1195

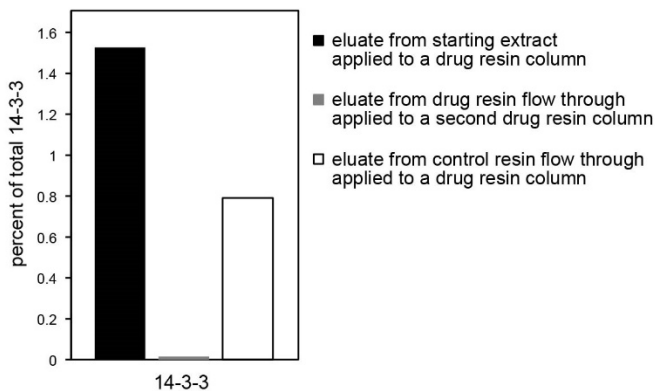

1196  
1197  
1198  
1199  
1200  
1201  
1202  
1203

**Supplementary Figure S4.** Assembly machines represent a small subset of the total cellular abundance of their protein components, demonstrated here with eluates from a serial eDRAC experiment using a pig lung extract analyzed by SDS-PAGE and WB for direct drug binding protein 14-3-3. Representative data shown.



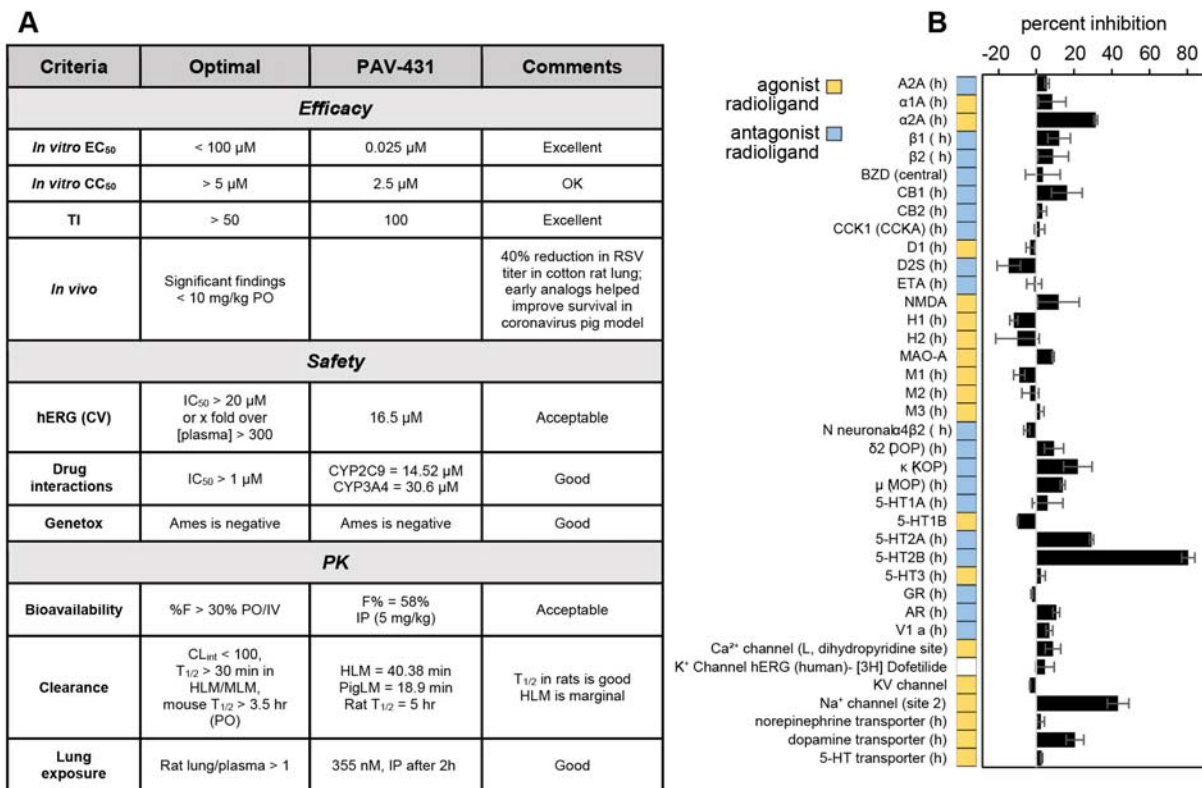

1204  
1205  
1206  
1207  
1208  
1209  
1210  
1211  
1212

**Supplementary Figure S5.** Progression to a target product profile. (A) PAV-431 demonstrated a range of parameters that need to be fulfilled for clinical candidate nomination. (B) *In vitro* Cerep panel, a commercial screen for potential to bind to a broad panel of receptors, enzymes, and ion channels, reported as percent inhibition of control specific binding. PAV-431 was tested at 50μM, a concentration ~500x higher than antiviral EC<sub>50</sub>. Data shown are the averages of replicates; error bars indicate standard error.

|         | EC <sub>50</sub> FLUV | EC <sub>50</sub> CoV | safe dose | ↑ activity<br>↓ toxicity |
|---------|-----------------------|----------------------|-----------|--------------------------|
| PAV-431 | < 25 nM               | < 100 nM             | 5 mg/kg   |                          |
| PAV-471 | < 10 nM               | < 10 nM              | 1 mg/kg   |                          |
| PAV-104 | < 10 nM               | < 10 nM              | 15 mg/kg  |                          |

↑ toxicity

1213  
1214  
1215  
1216  
1217  
1218

**Supplementary Figure S6.** Summary of efficacy against FLUV A/WSN/33 in MDCK cells, efficacy against human coronavirus CoV229E in MRC-5 cells, and toxicology in BALB/c mice by intraperitoneal injection. Advanced analogs PAV-471 and PAV-104 both exhibit potent antiviral activity; PAV-104 is dramatically less toxic than PAV-471



1219 **Supplementary Tables**

1220

1221

1222

| <b>compound</b> | <b>molecular weight (g/mol)</b> | <b>log P</b> | <b>H-bond donors</b> | <b>H-bond acceptors</b> | <b>topological polar surface area (Å<sup>2</sup>)</b> |
|-----------------|---------------------------------|--------------|----------------------|-------------------------|-------------------------------------------------------|
| PAV-773         | 331.416                         | 2.74         | 1                    | 4                       | 65.38                                                 |
| PAV-835         | 315.373                         | 1.72         | 1                    | 4                       | 65.38                                                 |
| PAV-431         | 369.344                         | 3.3          | 1                    | 4                       | 65.38                                                 |
| PAV-471         | 547.72                          | 1.76         | 1                    | 7                       | 106                                                   |
| PAV-104         | 581.69                          | 1.31         | 1                    | 7                       | 123.07                                                |

1223

1224 **Table S1.** Drug-like properties of compounds in the lead series progression to PAV-431 and beyond,

1225 including parameters related to Lipinski's "rule of five".

1226

1227

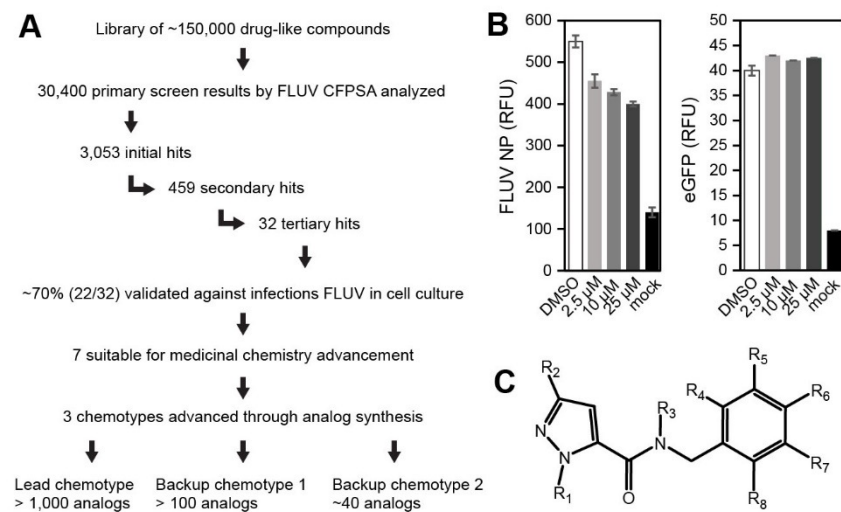

Figure 1. Mueller-Schiffmann et al.

**Legend to Figure 1.** A. Output of the moderate throughput CFPSA screen involving FLUV nucleoprotein, culminating in three chemotypes validated against infectious virus, one of which was most extensively advanced and is presented here. B. Initial hit (PAV-770) of this chemotype in the plate screen showing dose-dependent titration of FLUV RFUs (left, reflecting inhibition of np multimerization/assembly) with no effect on eGFP RFUs (right, reflecting inhibition of protein synthesis). C. Markush structure of the lead series. D. Initial structure-activity relationship based on assessment of FLUV infectivity in MDCK cells treated with these analogs.

**D**

| compound | R <sub>1</sub>                     | R <sub>2</sub> | R <sub>3</sub> | R <sub>4</sub>    | R <sub>5</sub>     | R <sub>6</sub>    | R <sub>7</sub> | R <sub>8</sub> | EC <sub>50</sub> (μM) |
|----------|------------------------------------|----------------|----------------|-------------------|--------------------|-------------------|----------------|----------------|-----------------------|
| PAV-770  | Me                                 | t-Bu           | H              | O-CH <sub>2</sub> | CH <sub>2</sub> -O | H                 | F              | H              | 1 - 3                 |
| PAV-868  | Me                                 | t-Bu           | H              | OMe               | OMe                | OMe               | H              | H              | > 3                   |
| PAV-858  | Me                                 | t-Bu           | H              | OMe               | H                  | OMe               | OMe            | H              | > 3                   |
| PAV-772  | Me                                 | t-Bu           | H              | OMe               | F                  | H                 | F              | H              | 3                     |
| PAV-736  | CH <sub>2</sub> CH <sub>2</sub> OH | t-Bu           | H              | OMe               | OMe                | H                 | H              | H              | > 3                   |
| PAV-869  | Me                                 | t-Bu           | H              | OPr               | OMe                | H                 | H              | H              | > 3                   |
| PAV-773  | Me                                 | t-Bu           | H              | OMe               | OMe                | H                 | H              | H              | < 1                   |
| PAV-1866 | Me                                 | t-Bu           | Me             | OMe               | OMe                | H                 | H              | H              | > 3                   |
| PAV-834  | Me                                 | Me             | H              | OMe               | OMe                | H                 | H              | H              | 3                     |
| PAV-854  | Me                                 | Cy-hex         | H              | OMe               | OMe                | H                 | H              | H              | > 1                   |
| PAV-530  | Me                                 | iPr            | H              | OMe               | OMe                | H                 | H              | H              | 1                     |
| PAV-835  | Me                                 | cyPr           | H              | OMe               | OMe                | H                 | H              | H              | < 1                   |
| PAV-895  | Me                                 | cyPr           | H              | OMe               | Me                 | H                 | H              | H              | 2                     |
| PAV-039  | Me                                 | cyPr           | H              | OMe               | OMe                | H                 | H              | F              | 1                     |
| PAV-896  | Me                                 | cyPr           | H              | Me                | OMe                | H                 | H              | H              | 1.5                   |
| PAV-700  | Me                                 | cyPr           | H              | Cl                | OMe                | H                 | H              | H              | 2                     |
| PAV-235  | Me                                 | cyPr           | H              | F                 | OMe                | H                 | H              | H              | 0.2                   |
| PAV-944  | Me                                 | cyPr           | H              | OMe               | CF <sub>3</sub>    | H                 | H              | H              | 0.2                   |
| PAV-901  | Me                                 | cyPr           | H              | CF <sub>3</sub>   | OMe                | H                 | H              | H              | 0.3                   |
| PAV-671  | Me                                 | cyPr           | H              | H                 | Cl                 | OCF <sub>3</sub>  | H              | H              | 0.05                  |
| PAV-774  | Me                                 | cyPr           | H              | Cl                | OCF <sub>3</sub>   | H                 | H              | H              | 0.2                   |
| PAV-431  | Me                                 | cyPr           | H              | OMe               | OCF <sub>3</sub>   | H                 | H              | H              | < 0.1                 |
| PAV-528  | Me                                 | cyPr           | H              | OCHF <sub>2</sub> | OCHF <sub>2</sub>  | H                 | H              | H              | < 0.1                 |
| PAV-877  | Me                                 | cyPr           | H              | H                 | Me                 | OCHF <sub>2</sub> | Me             | H              | > 2                   |

Figure 2. Mueller-Schiffmann et al.

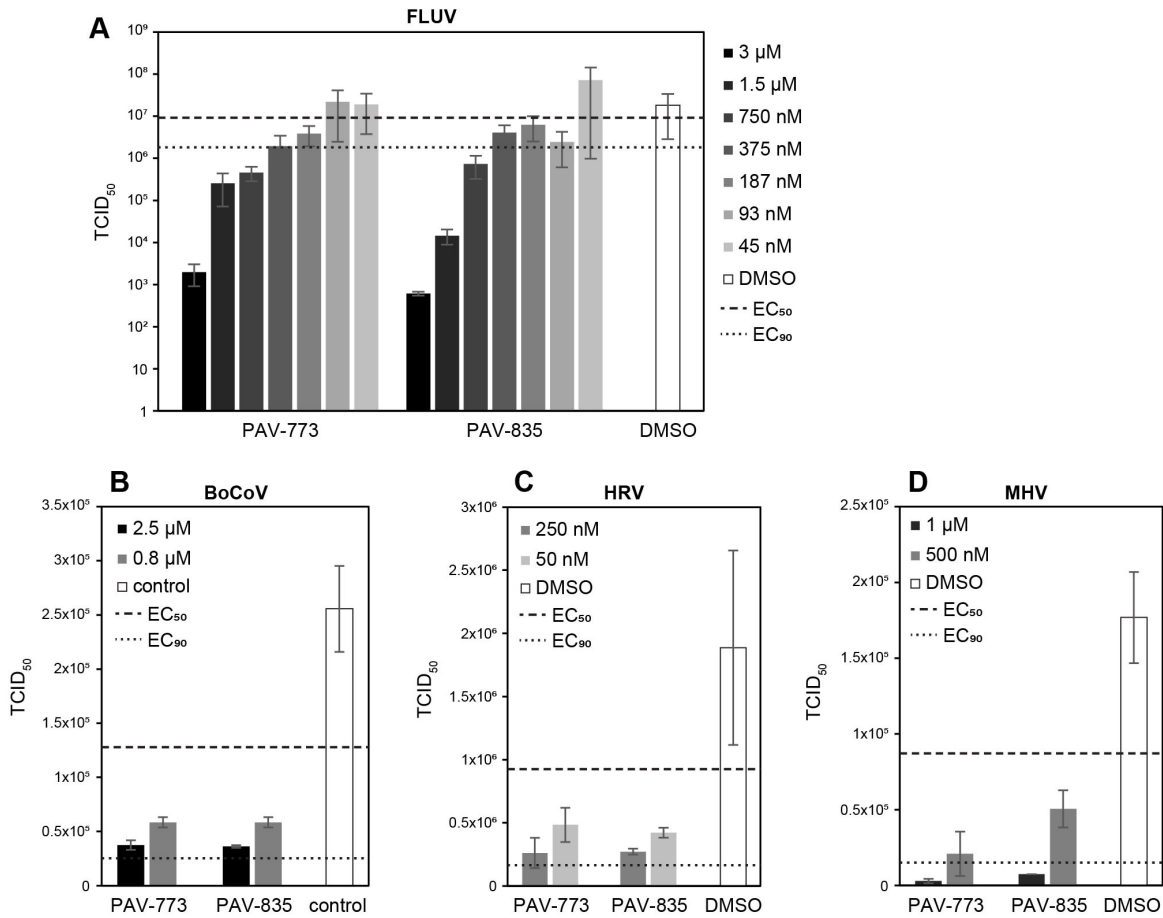

**Legend to Figure 2.** Assessment of pan-respiratory antiviral activity of early compounds PAV-773 and PAV-835, determined by  $TCID_{50}$ . Data shown are the averages of three biological replicates; error bars indicate standard error; DMSO is included as the vehicle control. **(A)** FLUV A/WSN/33 in MDCK cells. **(B)** BoCoV (BRCV-OK-0514-2) in HRT-18G cells, **(C)** HRV-16 in H1-HeLa cells, **(D)** MHV-68 in BHK-2 cells. Dashed line is the  $EC_{50}$ . Dotted line is the  $EC_{90}$ .

Figure 3. Mueller-Schiffmann et al.

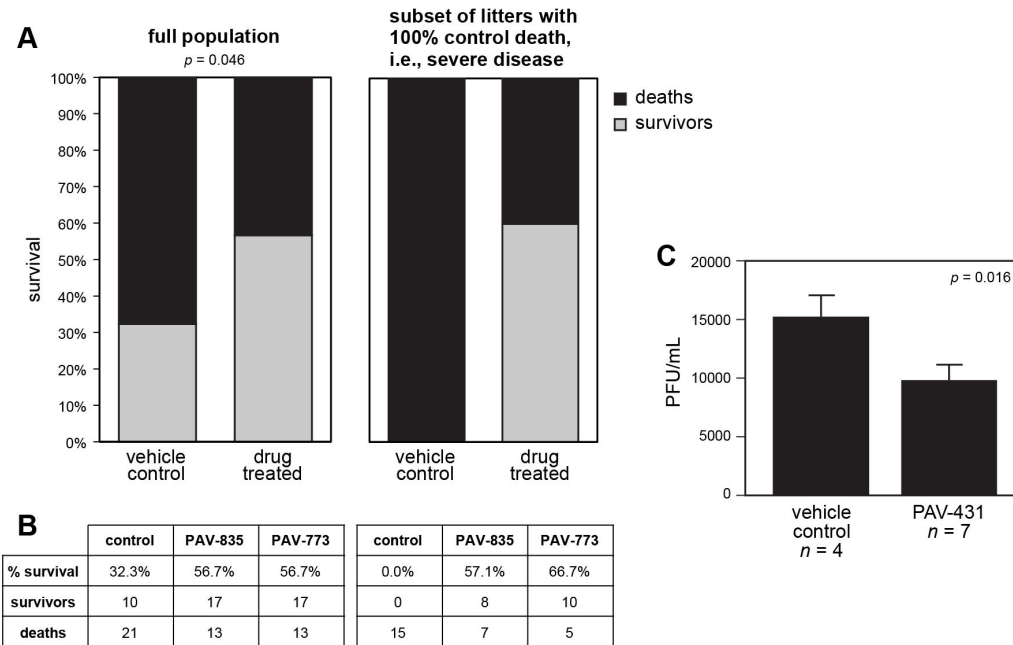

**Legend to Figure 3.** Early analogs validated in animal efficacy trials. **(A-B)** PEDV pig trial, evaluated by survival. **(A)** Assembly modulator compounds demonstrated efficacy against both mild and severe disease. As PAV-773 and PAV-835 showed equal efficacy, they have been combined (Fisher exact test  $p = 0.046$ ). The left panel shows percent survival for all animals in the study. The right panel shows the subset of litters in which all control animals (treated with vehicle only) died. **(B)** Breakdown of survival for PAV-773 and PAV-835 separately for both the total population and the severe disease subset, where  $p = 0.002$  and  $p = 0.004$ , respectively. This breakdown reveals the compounds to be as potent against mild disease (groups in which there were vehicle-only survivors) as in severe disease (groups in which there were no vehicle-only survivors). **(C)** RSV cotton rat trial, evaluated by day 5 lung viral titer determined by plaque assay. A significant drop in viral titer was observed with PAV-431 treatment (unpaired  $t$ -test  $p = 0.016$ ). Data shown are averages; error bars indicate standard error.

Figure 4. Mueller-Schiffmann et al.

**A**

| cell line | virus (family)                                                    | PAV-431 EC <sub>50</sub> |
|-----------|-------------------------------------------------------------------|--------------------------|
| MDCK      | influenza A/WSN/33 ( <i>Orthomyxoviridae</i> )                    | 25 nM                    |
| MDCK      | swine influenza virus SIV/SK WT ( <i>Orthomyxoviridae</i> )       | 25 nM                    |
| GBK       | bovine coronavirus ( <i>Coronaviridae</i> )                       | 50 nM                    |
| Vero E6   | SARS-CoV-2 WA1/2020 ( <i>Coronaviridae</i> )                      | 100 nM                   |
| HEp2      | respiratory syncytial virus strain A-2 ( <i>Paramyxoviridae</i> ) | < 25 nM                  |
| HSAEC1-KT | Nipah virus rNiV-ZsG ( <i>Paramyxoviridae</i> )                   | ≤ 50 nM                  |
| A549      | adenovirus serotype 5 strain adenoid 65 ( <i>Adenoviridae</i> )   | < 100 nM                 |
| H1-Hela   | human cytomegalovirus strain AD69 ( <i>Herpesviridae</i> )        | 25 nM                    |
| H1-Hela   | human rhinovirus 16 ( <i>Picornaviridae</i> )                     | < 20 nM                  |
| MNA       | rabies virus CVS-11 ( <i>Rhabdoviridae</i> )                      | > 400 nM                 |

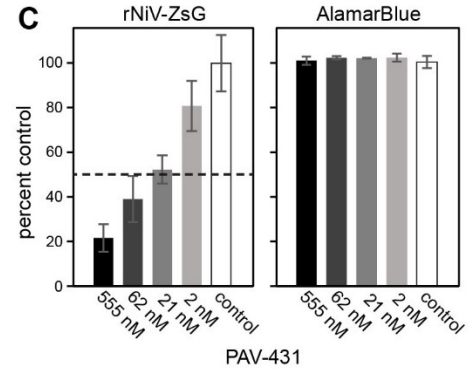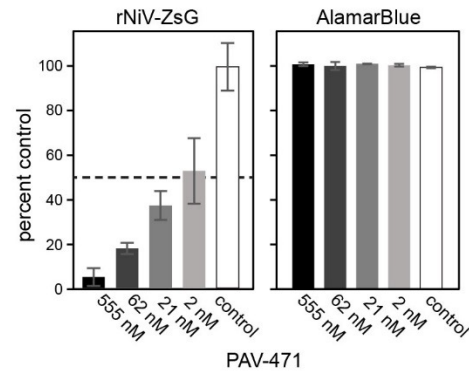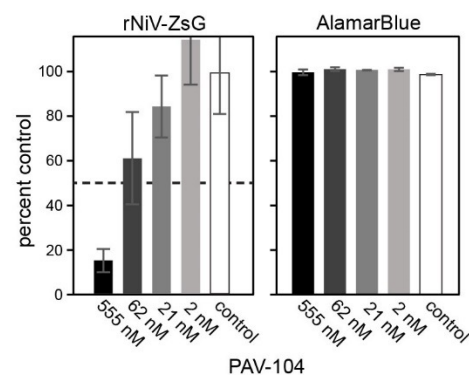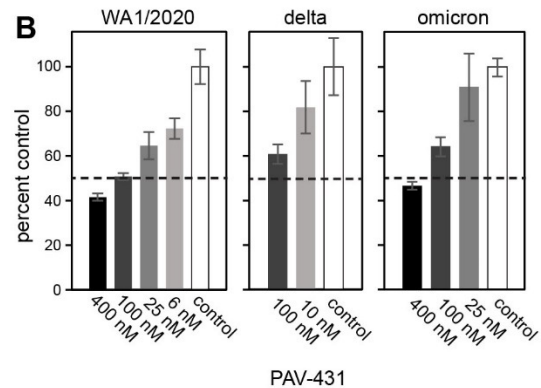

**Legend to Figure 4.** Pan-respiratory antiviral activity. **(A)** Efficacy of PAV-431 against each respiratory viral family in cell culture. **(B)** Dose-dependent antiviral activity of PAV-431 against multiple SARS-CoV-2 strains: (WA1/2020, lineage A) in Vero E6 cells, determined by plaque assay, delta variant (lineage B.1.617.2) and omicron variant (lineage B.A.1) in Calu-3 cells determined by qPCR measurement of the SARS-CoV-2 E gene and/or TCID<sub>50</sub>. Data shown are the averages of three biological replicates; error bars indicate standard error; DMSO is included as the vehicle control. **(C)**. Dose-dependent activity of PAV-431 and advanced analogs PAV-471 and PAV-104 against Nipah virus of the *Paramyxoviridae* family in primary-like human small airway epithelial cells (HSAEC1-KT)(Lo et al., 2014; Welch et al., 2020). Alamar Blue assessment of cytotoxicity shows no toxicity up to 5μM tested in 5mM glucose-supplemented minimum essential medium, so all therapeutic indices > 100

Figure 5. Mueller-Schiffmann et al.

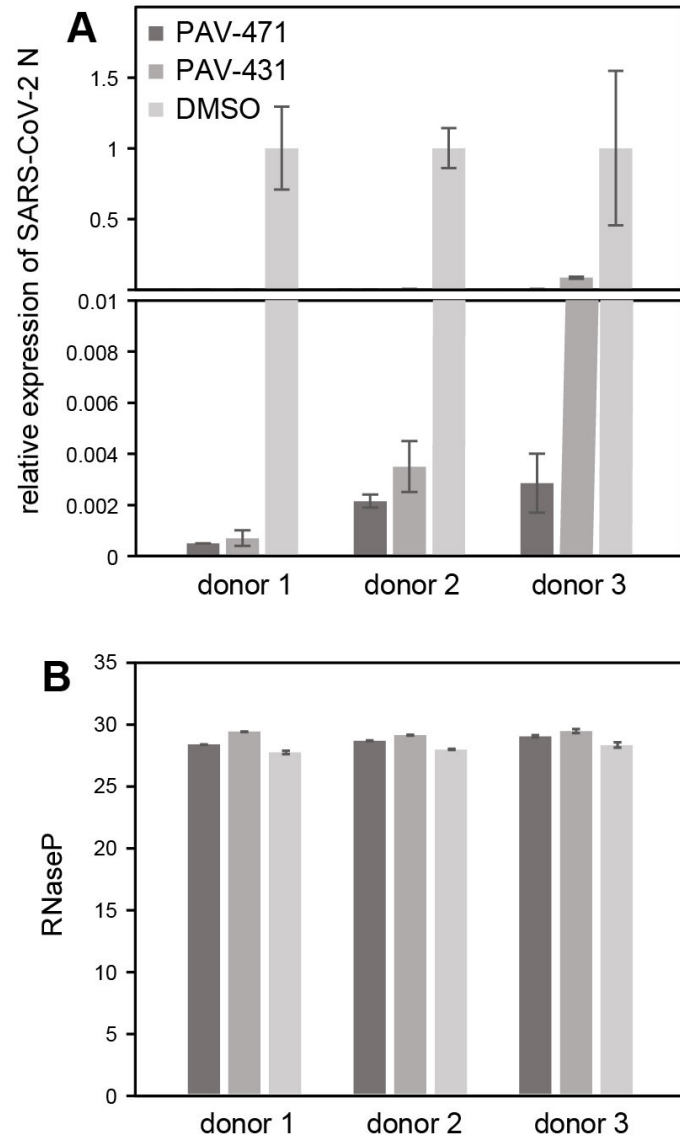

**Legend to Figure 5.** A. Assembly modulator compounds inhibit SARS-CoV-2 (gamma variant, lineage P.1) replication in primary human airway epithelial cells grown at an air-liquid interface, determined by qPCR measurement of the SARS-CoV-2 N gene. Data shown are the averages of two biological replicates; error bars indicate standard error; DMSO is included as the vehicle control. B. No significant toxicity was observed by assessment of levels of RNase P.



Figure 6. Mueller-Schiffmann et al.

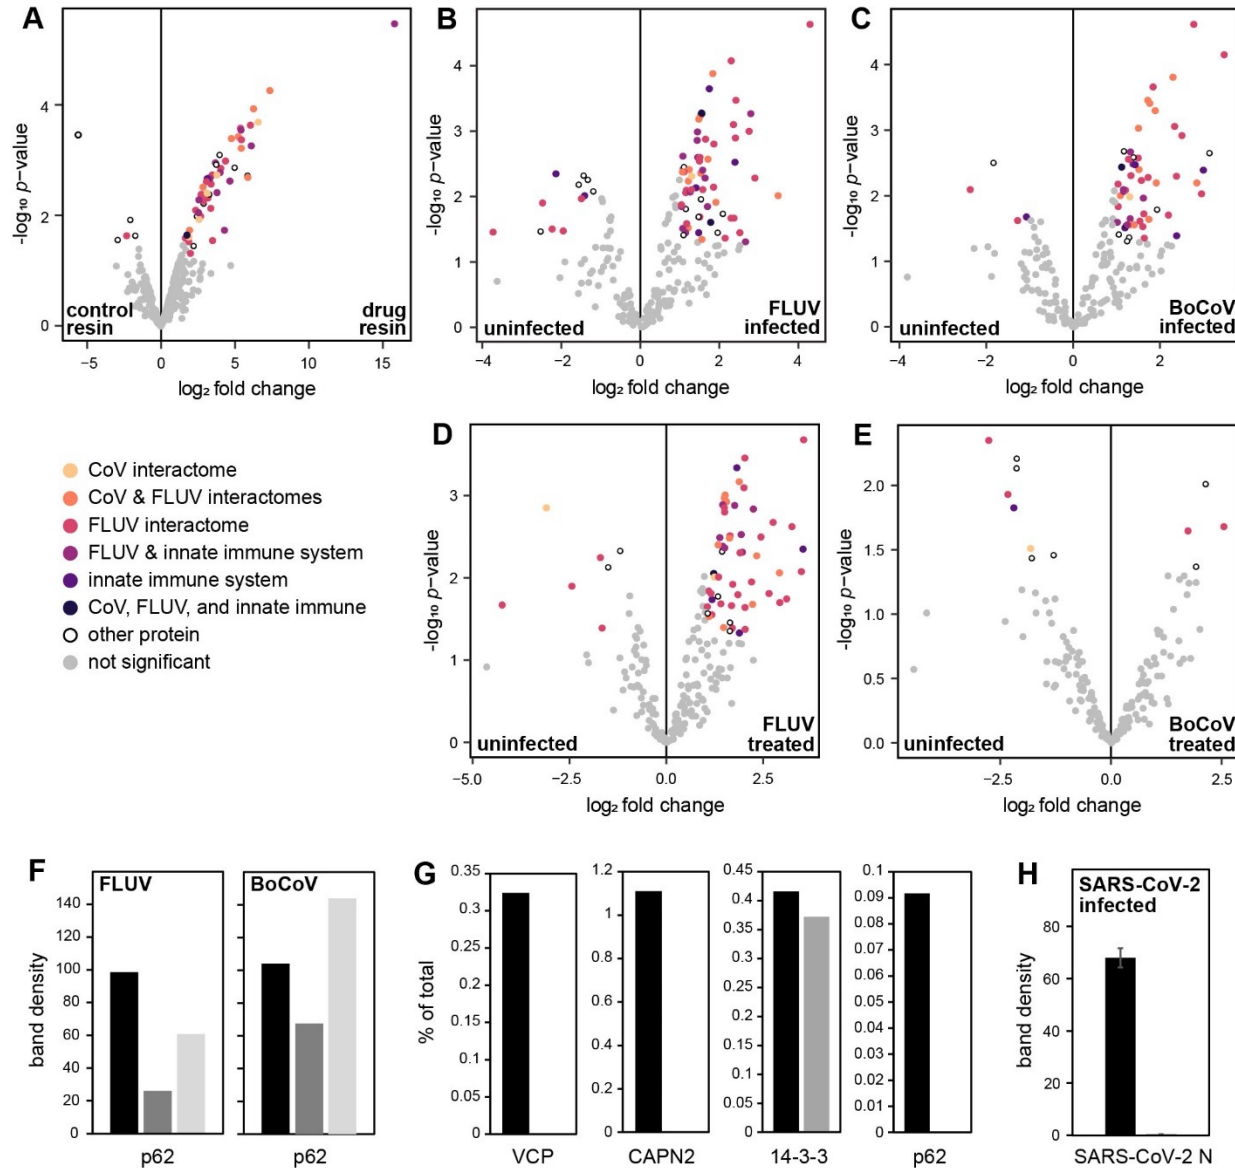

**Legend to Figure 6.** Drug target is a host multi-protein complex modified by viral infection and restored with drug treatment. **(A-E)** Volcano plots visualizing the protein composition of the target complex determined by MS-MS on triplicate eDRAC eluates from extracts of MRC-5 cells that were either uninfected, infected with FLUV or BoCoV, or infected and treated with PAV-431. Significant proteins ( $|\log_2$  fold change  $> 1$  and  $p$ -value  $< 0.05$ ) are colored based on their known involvement in the CoV, FLUV, and innate immune system interactomes and listed in Supplementary Figure S3. **(A)** Comparison between control resin and PAV-431 drug resin demonstrates drug specificity of the target complex. **(B-C)** Infection with FLUV (B) or BoCoV (C) modifies the target complex. **(D-E)**, Treatment with PAV-431 restores the target to the uninfected state, partially for FLUV (D) and almost completely for BoCoV (E). **(F)** eDRAC eluates from MRC-5 cells (left) and HRT-18G cells (right), uninfected or infected with either FLUV (left) or BoCoV (right), analyzed by SDS-PAGE and WB for target component p62. In both cases, viral infection resulted in a diminution of p62, which was restored by treatment with PAV-431 (right) and PAV-818 (left). **(G)** Crosslinked eDRAC eluates from pig lung extract co-precipitated under native or denaturing conditions and analyzed by SDS-PAGE and WB for target components p62, VCP, CAPN2, and 14-3-3. Presence under both conditions identifies 14-3-3 as the direct drug binding protein, while loss under denaturing conditions identifies the others as more distal components of the complex associated with the drug indirectly via other proteins in the complex that are associated with the direct-binding protein 14-3-3. **(H)** SARS-CoV-2 infected an PAV-431-treated cell lysate subjected to PAV-431 photocross-linking and streptavidin precipitation under non-denaturing conditions. A-E and H show the statistical significance of the findings, F and G show representative individual experiments. Drug concentration for treatment of infected cells in H was 100nM.



**A**

|                                                                               |                                                                  | PAV-773           |                                       |                   | PAV-835 |                                     | PAV-431 |                                       |           | PAV-471 |                                      | PAV-104 |                                      |                                                           |
|-------------------------------------------------------------------------------|------------------------------------------------------------------|-------------------|---------------------------------------|-------------------|---------|-------------------------------------|---------|---------------------------------------|-----------|---------|--------------------------------------|---------|--------------------------------------|-----------------------------------------------------------|
| mouse maximum tolerated dose                                                  | safe dose route-dosage (mg/kg)                                   | -                 | IP-5                                  | -                 | -       | IP-1                                | -       | IP-5                                  | -         | -       | IP-1                                 | -       | IP-15                                | PO-50                                                     |
|                                                                               | toxic dose route-dosage (mg/kg)                                  | -                 | IP-15                                 | -                 | -       | IP-15                               | -       | IP-10                                 | -         | -       | IP-2                                 | -       | IP-20                                | PO-250                                                    |
| repeat dose toxicology<br><sup>a</sup> mouse 10 day<br><sup>b</sup> rat 7 day | route-dosage (mg/kg)                                             | -                 | IP-5 <sup>a</sup>                     | -                 | -       | IP-1 <sup>a</sup>                   | -       | IP-2 <sup>a</sup>                     | -         | -       | -                                    | -       | -                                    | PO-50 <sup>b</sup>                                        |
|                                                                               | body weight, clinical signs, histopathology, clinical parameters | -                 | NAD/NSSD                              | -                 | -       | NAD/NSSD                            | -       | NAD/NSSD                              | -         | -       | -                                    | -       | -                                    | NAD/NSSD                                                  |
| rat PK<br><sup>c</sup> mouse                                                  | route-dosage (mg/kg)                                             | IV-1 <sup>c</sup> | IP-5 <sup>c</sup>                     | PO-5 <sup>c</sup> | IV-0.2  | IP-1                                | IV-1    | IP-5                                  | PO-5      | IV-0.2  | IP-1                                 | IV-1    | IP-5                                 | PO-20                                                     |
|                                                                               | AUC <sub>last</sub> (nM.h)                                       | 2287              | 733                                   | 253               | 428     | 1043                                | 831     | 2464                                  | low conc. | 108     | 371                                  | 543     | 2510                                 | 3247                                                      |
|                                                                               | AUC <sub>inf</sub> (nM.h)                                        | ND                | ND                                    | ND                | 428     | 1047                                | 926     | 2499                                  |           | 135     | 387                                  | 559     | 2656                                 | 3620                                                      |
|                                                                               | C <sub>max</sub> (nM)                                            | ND                | 1035                                  | 51                | 1608    | 2842                                | 685     | 793                                   |           | 152     | 550                                  | 1379    | 2243                                 | 1417                                                      |
|                                                                               | T <sub>max</sub> (h)                                             | ND                | 0.08                                  | 4                 | 0.03    | 0.08                                | 0.08    | 0.25                                  |           | 0.08    | 0.25                                 | 0.08    | 0.25                                 | 0.5                                                       |
|                                                                               | t <sub>1/2</sub> (h)                                             | ND                | ND                                    | ND                | 0.5     | 0.4                                 | 12      | 5                                     |           | 4       | 2                                    | 2       | 7                                    | 9                                                         |
|                                                                               | CL (mL/min)                                                      | 1.3               | -                                     | -                 | 25      | -                                   | 49      | -                                     |           | 45      | -                                    | 51      | -                                    | -                                                         |
|                                                                               | V <sub>z</sub> (L/Kg)                                            | 13.3              | -                                     | -                 | 0.5     | -                                   | 32      | -                                     |           | 12      | -                                    | 4       | -                                    | -                                                         |
| F (%)                                                                         | -                                                                | 7                 | 2.2                                   | -                 | 49      | -                                   | 59      | -                                     |           | 69      | -                                    | 95      | 32                                   |                                                           |
| rat uptake<br><sup>c</sup> mouse                                              | route-dosage (mg/kg)                                             | -                 | IP-5 <sup>c</sup>                     | -                 | -       | IP-1 <sup>c</sup>                   | -       | IP-5                                  | -         | -       | IP-1                                 | -       | IP-5                                 | PO-20                                                     |
|                                                                               | concentration in lungs (nM)                                      | -                 | 866 <sup>d</sup><br>109 <sup>e</sup>  | -                 | -       | 98 <sup>a</sup><br>5 <sup>a</sup>   | -       | 1224 <sup>a</sup><br>355 <sup>a</sup> | -         | -       | 739 <sup>a</sup><br>175 <sup>a</sup> | -       | 160 <sup>a</sup><br>485 <sup>a</sup> | 306 <sup>e</sup><br>113 <sup>a</sup><br>53 <sup>a</sup>   |
|                                                                               | concentration in brain (nM)                                      | -                 | 2148 <sup>d</sup><br>169 <sup>e</sup> | -                 | -       | 178 <sup>a</sup><br>20 <sup>a</sup> | -       | 1416 <sup>a</sup><br>479 <sup>a</sup> | -         | -       | 334 <sup>a</sup><br>69 <sup>a</sup>  | -       | 17 <sup>a</sup><br>BLOQ <sup>a</sup> | 26 <sup>a</sup><br>BLOQ <sup>a</sup><br>BLOQ <sup>a</sup> |
|                                                                               | concentration in plasma (nM)                                     | -                 | 1657 <sup>d</sup><br>250 <sup>e</sup> | -                 | -       | 181 <sup>a</sup><br>18 <sup>a</sup> | -       | 834 <sup>a</sup><br>333 <sup>a</sup>  | -         | -       | 265 <sup>a</sup><br>40 <sup>a</sup>  | -       | 397 <sup>a</sup><br>261 <sup>a</sup> | 1011 <sup>e</sup><br>371 <sup>a</sup><br>22 <sup>a</sup>  |

Figure 7. Mueller-Schiffmann et al.

**Legend to Figure 7.** Pharmacokinetic and toxicological assessment of the lead series in BALB/c mice and Sprague Dawley rats. **(A)** Summary of results. IV, intravenous; IP, intraperitoneal; PO, per oral; PK, pharmacokinetics; AUC<sub>last</sub>, area under the curve from time zero to the last quantifiable concentration; AUC<sub>inf</sub>, area under the curve vs. time curve extrapolated to infinity; C<sub>max</sub>, peak plasma concentration; T<sub>max</sub>, time of peak concentration observed; t<sub>1/2</sub>, terminal half-life; CL, steady-state clearance; V<sub>z</sub>, volume of distribution; F, fraction bioavailability; NAD, no abnormality detected; NSSD, no significant statistical difference; BLOQ, below level of quantification; ND, not determined. Pharmacokinetic parameters were determined using WinNonlin software. **(B)** PAV-104 levels following acute repeat dose toxicology evaluation in Sprague Dawley rats with a daily oral dose of 50 mg/kg for 7 days. Trough plasma levels exceed EC<sub>50</sub> by ~100 fold. Data shown are the averages of 5 animals; error bars indicate standard deviation.

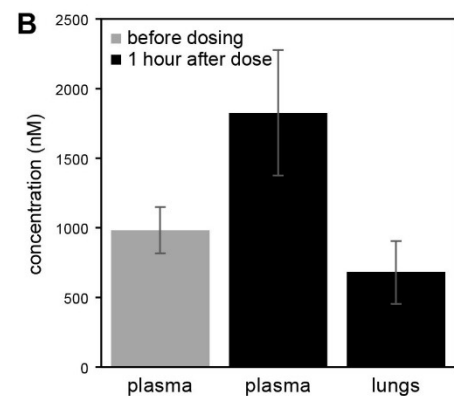

Figure 8. Mueller-Schiffmann et al.

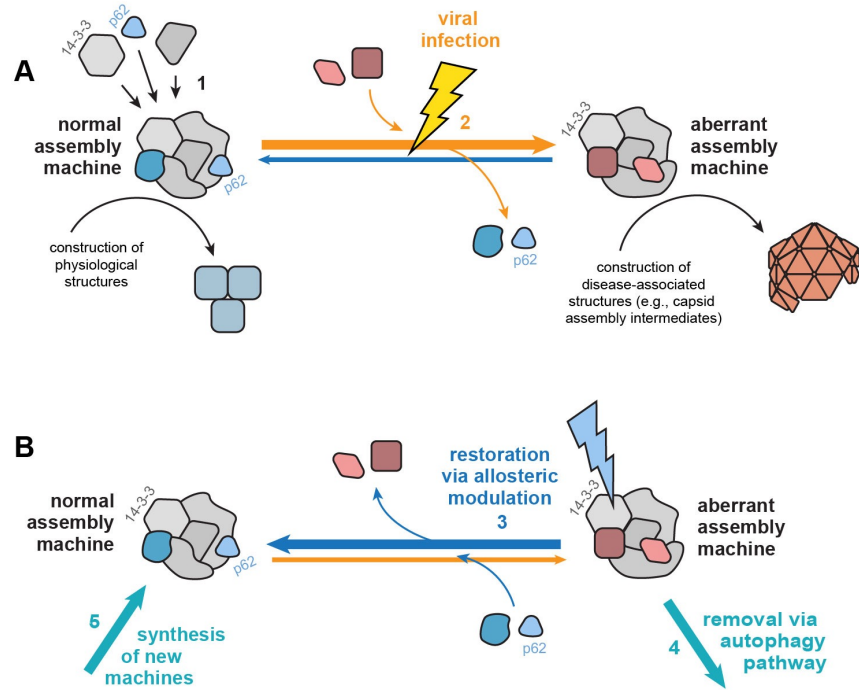

**Figure 8.** Cartoon summarizing our working hypothesis on assembly modulation therapeutics. **(A)** Normal assembly machines are transient host multi-protein complexes that come together to carry out various events involved in the construction of physiological structures and maintenance of homeostasis (1). Viruses have evolved to co-opt the assembly machines of their hosts to meet their own needs, presumably through signaling pathway manipulation and/or allosteric site modulation (2). This results in the formation of aberrant assembly machines that do something they are not supposed to do (e.g. build a viral capsid) and perhaps fails to do something they are supposed to do (e.g. inform innate immunity that the cell is under viral attack) due to loss of autophagy regulator p62. The former action is reflected as viral replication and the latter action is reflected in the failure of autophagic innate immune defense. Both consequences manifest as disease and their molecular basis is the normal to aberrant change in assembly machine composition. **(B)** Treatment with assembly modulators results in elimination of aberrant assembly machines and restoration of normal assembly machines. This could be a result of either direct action on the allosteric site (e.g. affecting protein-protein interactions such that the normal assembly machine is stabilized) or indirectly by activation of autophagy to destroy the aberrant assembly machines (4) followed by homeostatic feedback repopulation of normal assembly machines (5).

Table 1. Mueller-Schiffmann et al.

|                    |                         | <b>percent reduction in infection</b> |
|--------------------|-------------------------|---------------------------------------|
| <b>Oseltamivir</b> | passage 0 at 30 $\mu$ M | 91                                    |
|                    | passage 7 at 30 $\mu$ M | 21.4                                  |
| <b>PAV-835</b>     | passage 0 at 3 $\mu$ M  | 98.9                                  |
|                    | passage 7 at 3 $\mu$ M  | 91.9                                  |
| <b>PAV-333</b>     | passage 0 at 3 $\mu$ M  | 94.5                                  |
|                    | passage 7 at 3 $\mu$ M  | 92.5                                  |

**Legend to Table 1.** Evidence for a barrier to resistance development. MDCK cells were infected with FLUV (A/WSN/33) in the presence of Oseltamivir (935 nM to 30  $\mu$ M), PAV-835 (93.5 nM to 3  $\mu$ M), or PAV-333 (93.5 nM to 3  $\mu$ M). From passage to passage, drug concentrations were increased over the indicated ranges to encourage selection for resistance mutants. An initially Oseltamivir-sensitive FLUV strain became largely resistant after passage 7. In contrast, the two assembly modulator compounds PAV-835 and PAV-333 showed minimal loss of drug sensitivity.
